# Supplementary material for: Failure Analysis on 42CrMo Steel Bolt Fracture
Source: Hindawi journal article supplement (doi:10.1155/2019/2382759), 2019-01-01
Supplement: f1 [file 2382759.f1.zip]

Archive with 15 entries (15 files):
- partdrawing.docx
- Figure13.Micro-morphologyofcarbondepletionnearthefractureorigin.JPG
- Figure11.Magnifiedmicro-morphologyofsmallcracksinfractureoriginarea.JPG
- Figure10.Micro-morphologyofsmallcracksdistributedinfractureoriginarea.JPG
- Figure5.Grainsizeofboltmatrix.JPG
- Figure4.Metallographicstructureofboltmatrix.JPG
- partdrawing_1.docx
- Figure9.Energyspectrum.docx
- Figure8.Macro-morphologyofsecondaryfracturecrack.jpg
- Figure7Micro-morphologyoffractureextendedarea.jpg
- Figure6Micro-morphologyoffractureoriginarea.jpg
- Figure16.Micro-morphologyofcarbondepletionataddendumandbothtoothsidesofthebolt.JPG
- Figure12.Micro-morphologyofnon-metallicinclusionsnearthefracturesurface.JPG
- Figure15.Micro-morphologyofthematrixband.JPG
- Figure14.Micro-morphologyofthebandatthefractureorigin.JPG
