# Supplementary material for: Failure Analysis on 42CrMo Steel Bolt Fracture
Source: Hindawi journal article supplement (doi:10.1155/2019/2382759), 2019-01-01
Supplement: f1 [file 2382759.f1.zip › partdrawing.docx]

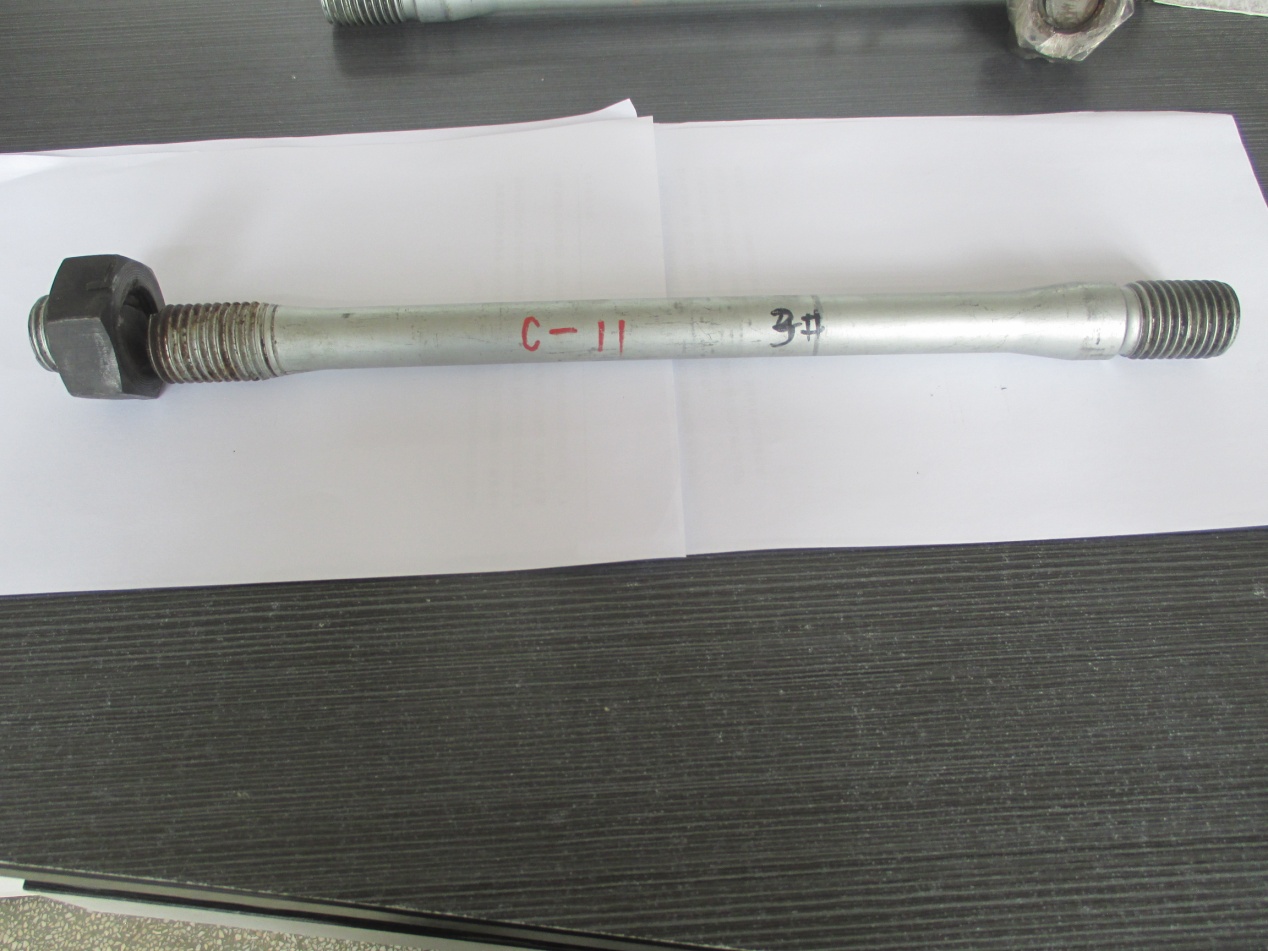


Fig.1 Macro-morphology of fracture bolt


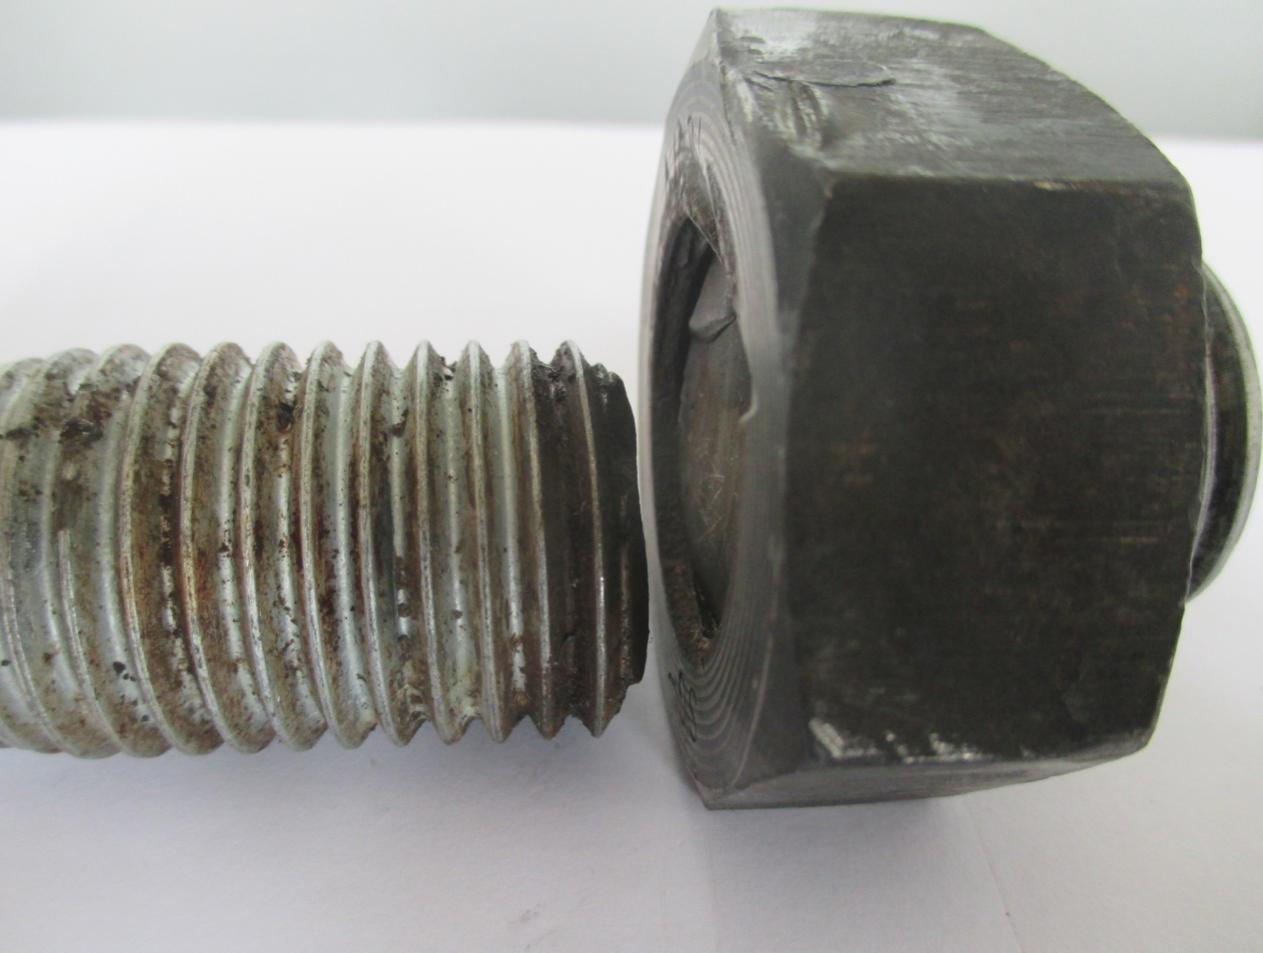


Fig.2 Appearance of the bolt fracture part


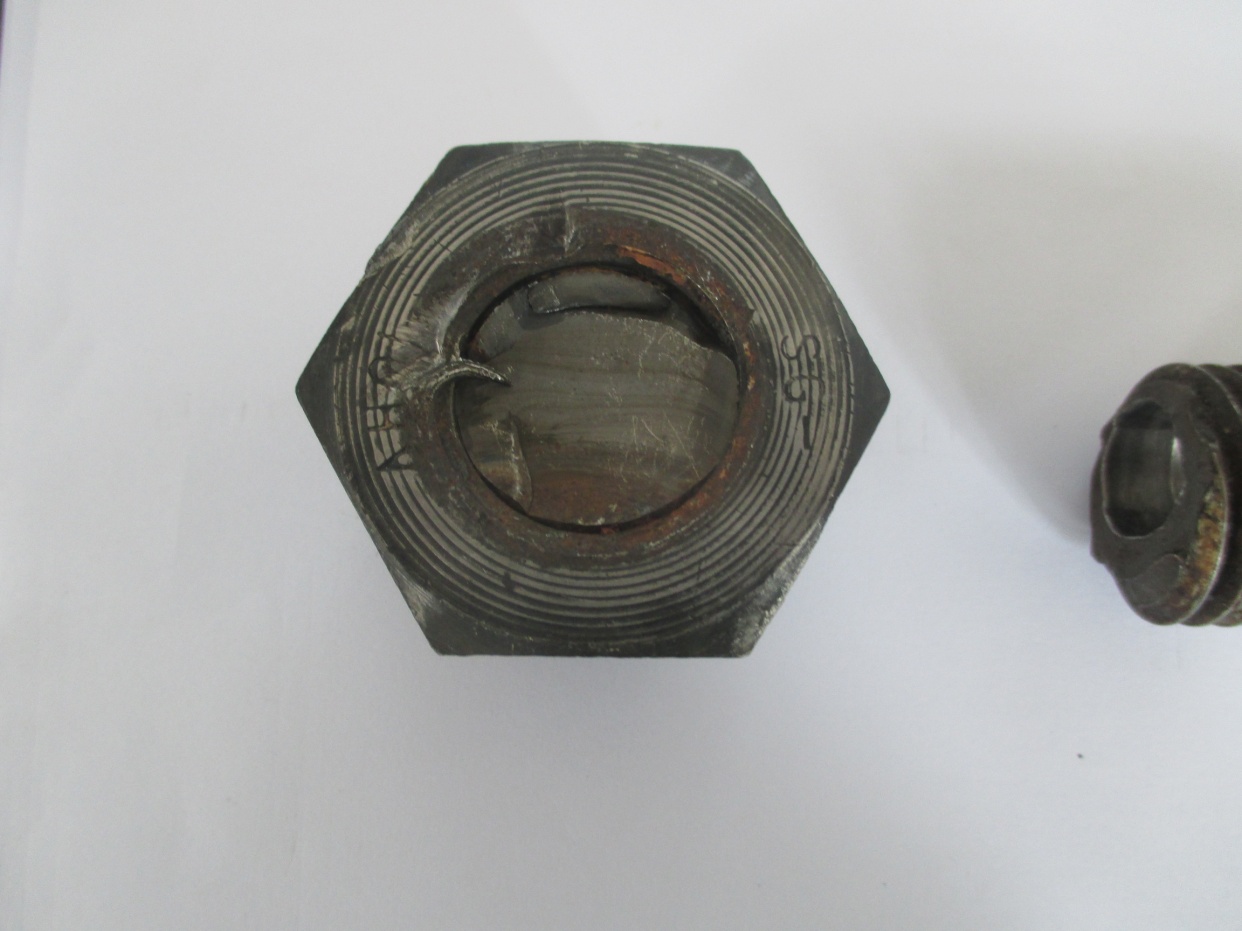


断裂源区

Fig.3 Appearance of the bolt fracture


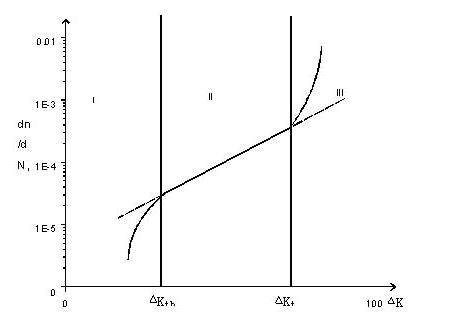


Figure 17. Typical fatigue crack growth curve
