# Supplementary figures and images for: Failure Analysis on 42CrMo Steel Bolt Fracture
Source: Hindawi journal article supplement (doi:10.1155/2019/2382759), 2019-01-01

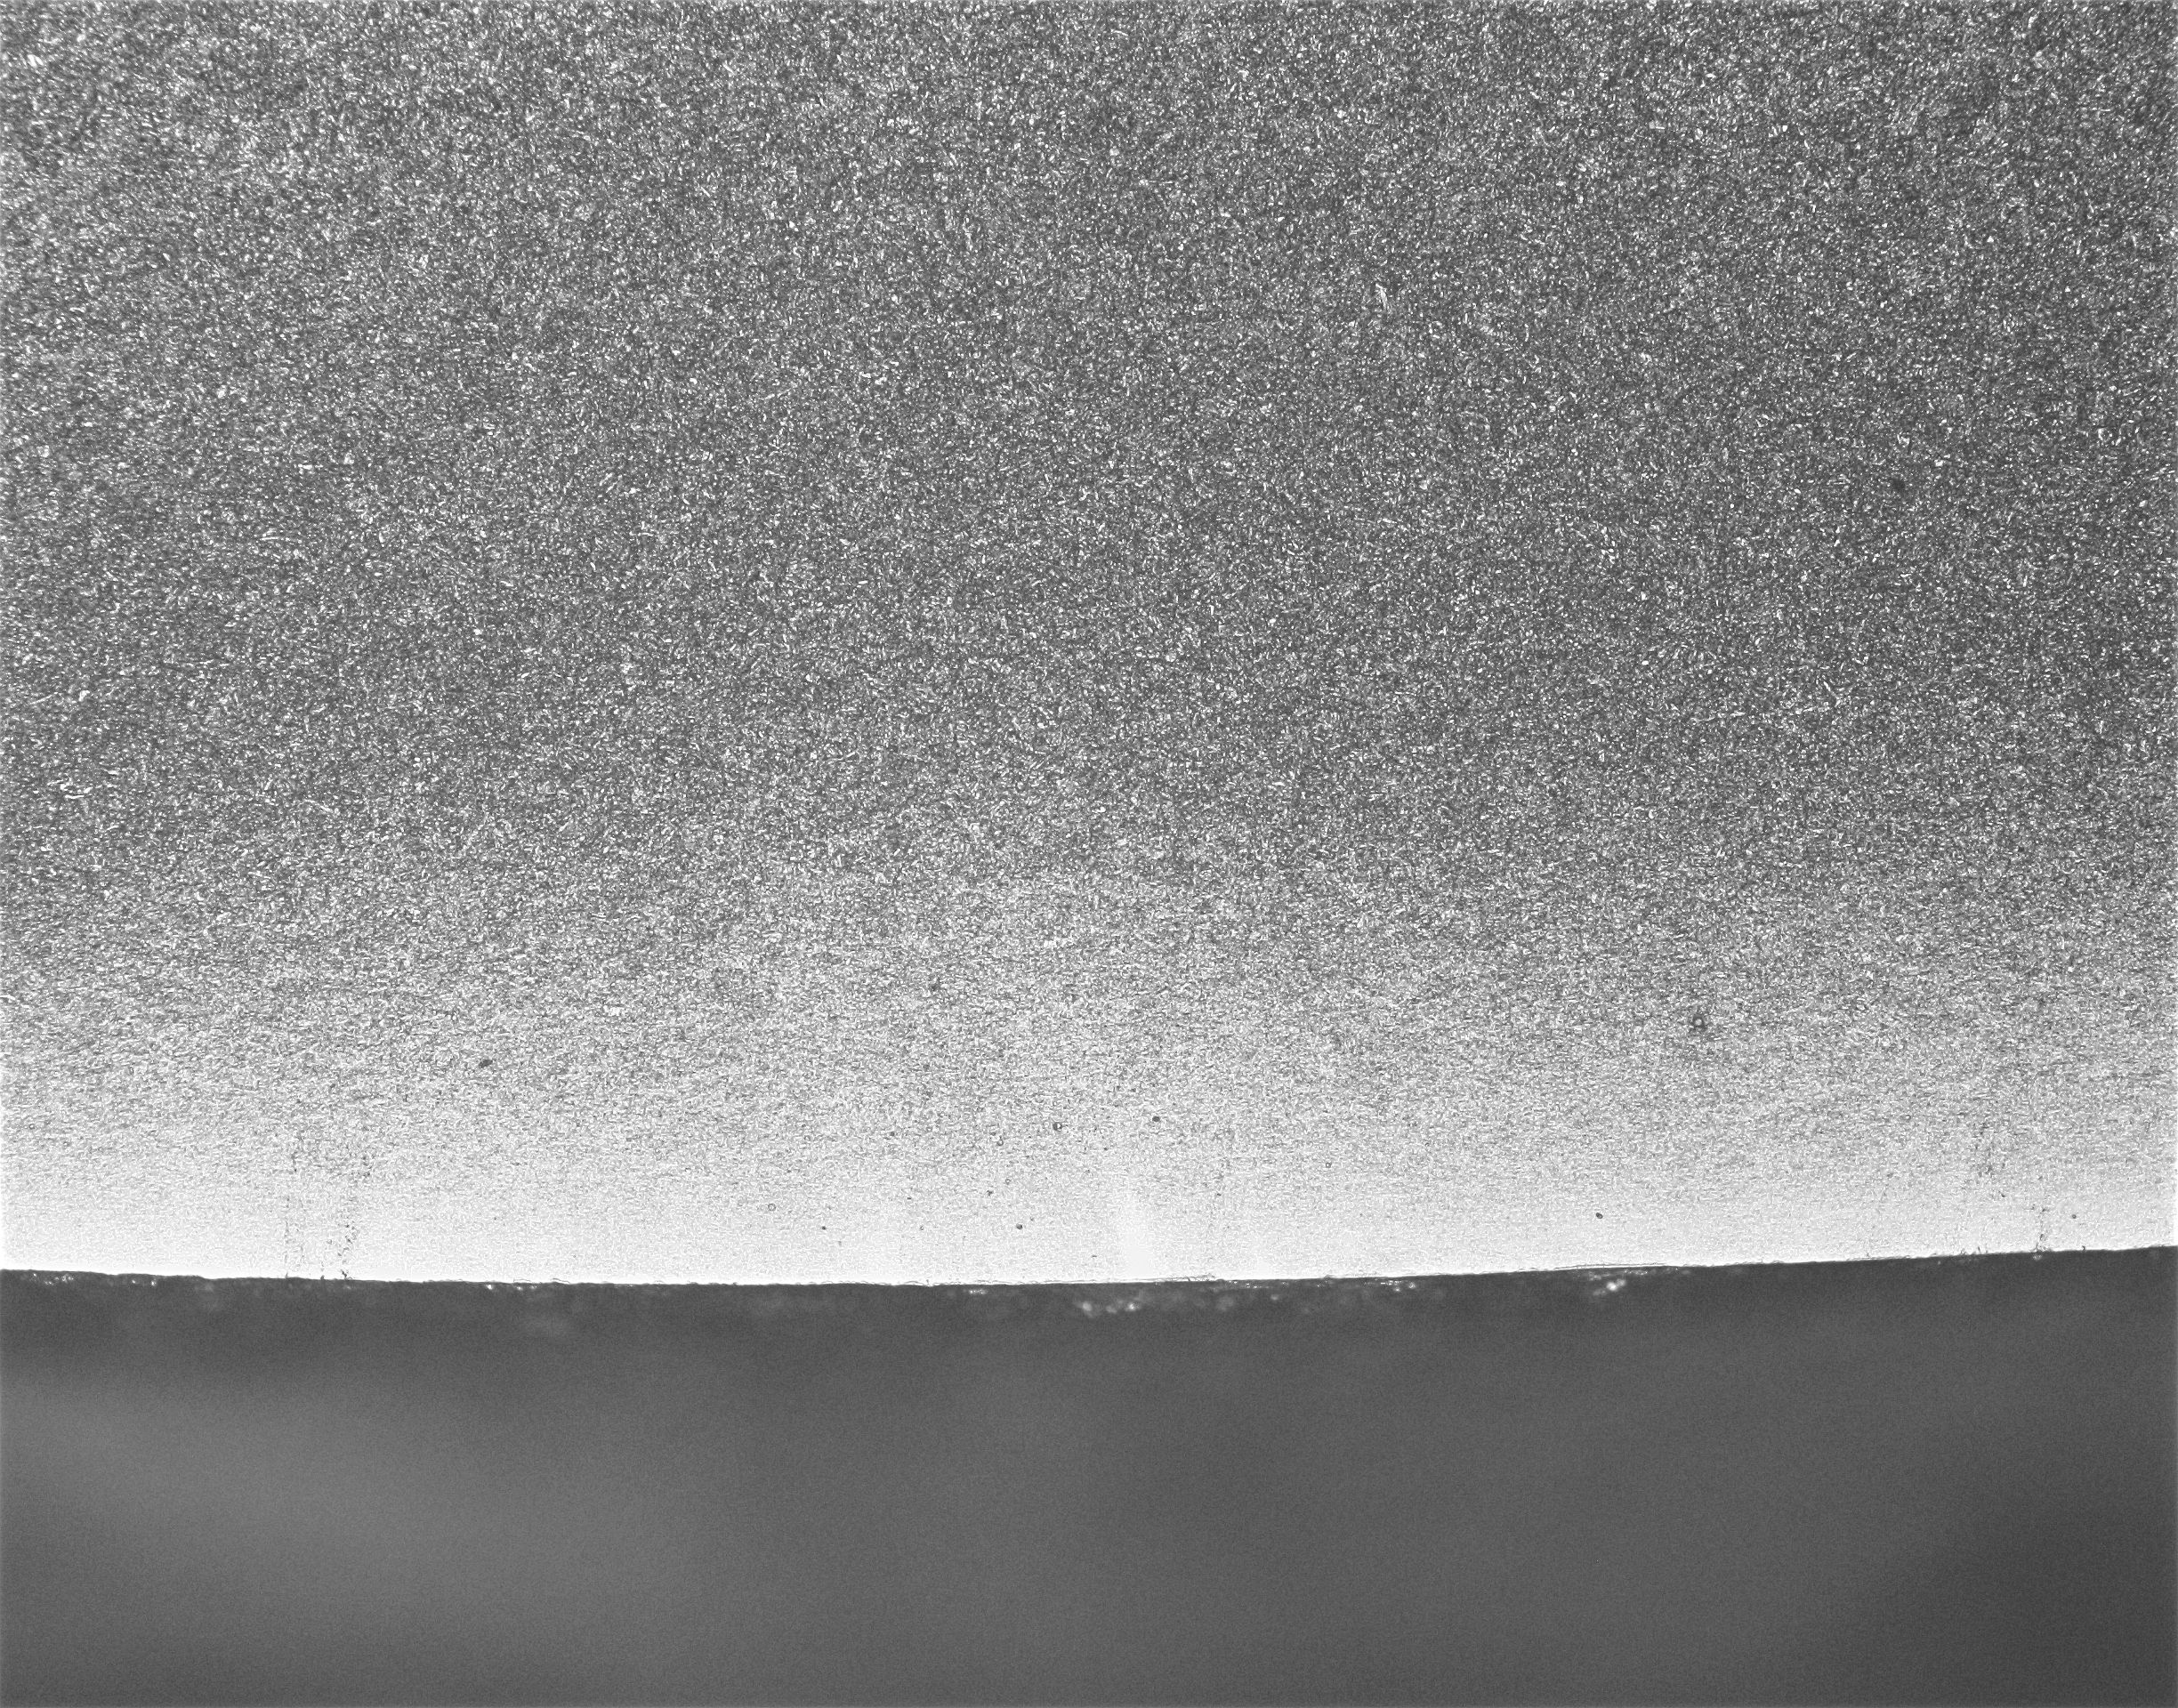

Supplement: f1 [file 2382759.f1.zip › Figure13.Micro-morphologyofcarbondepletionnearthefractureorigin.JPG]

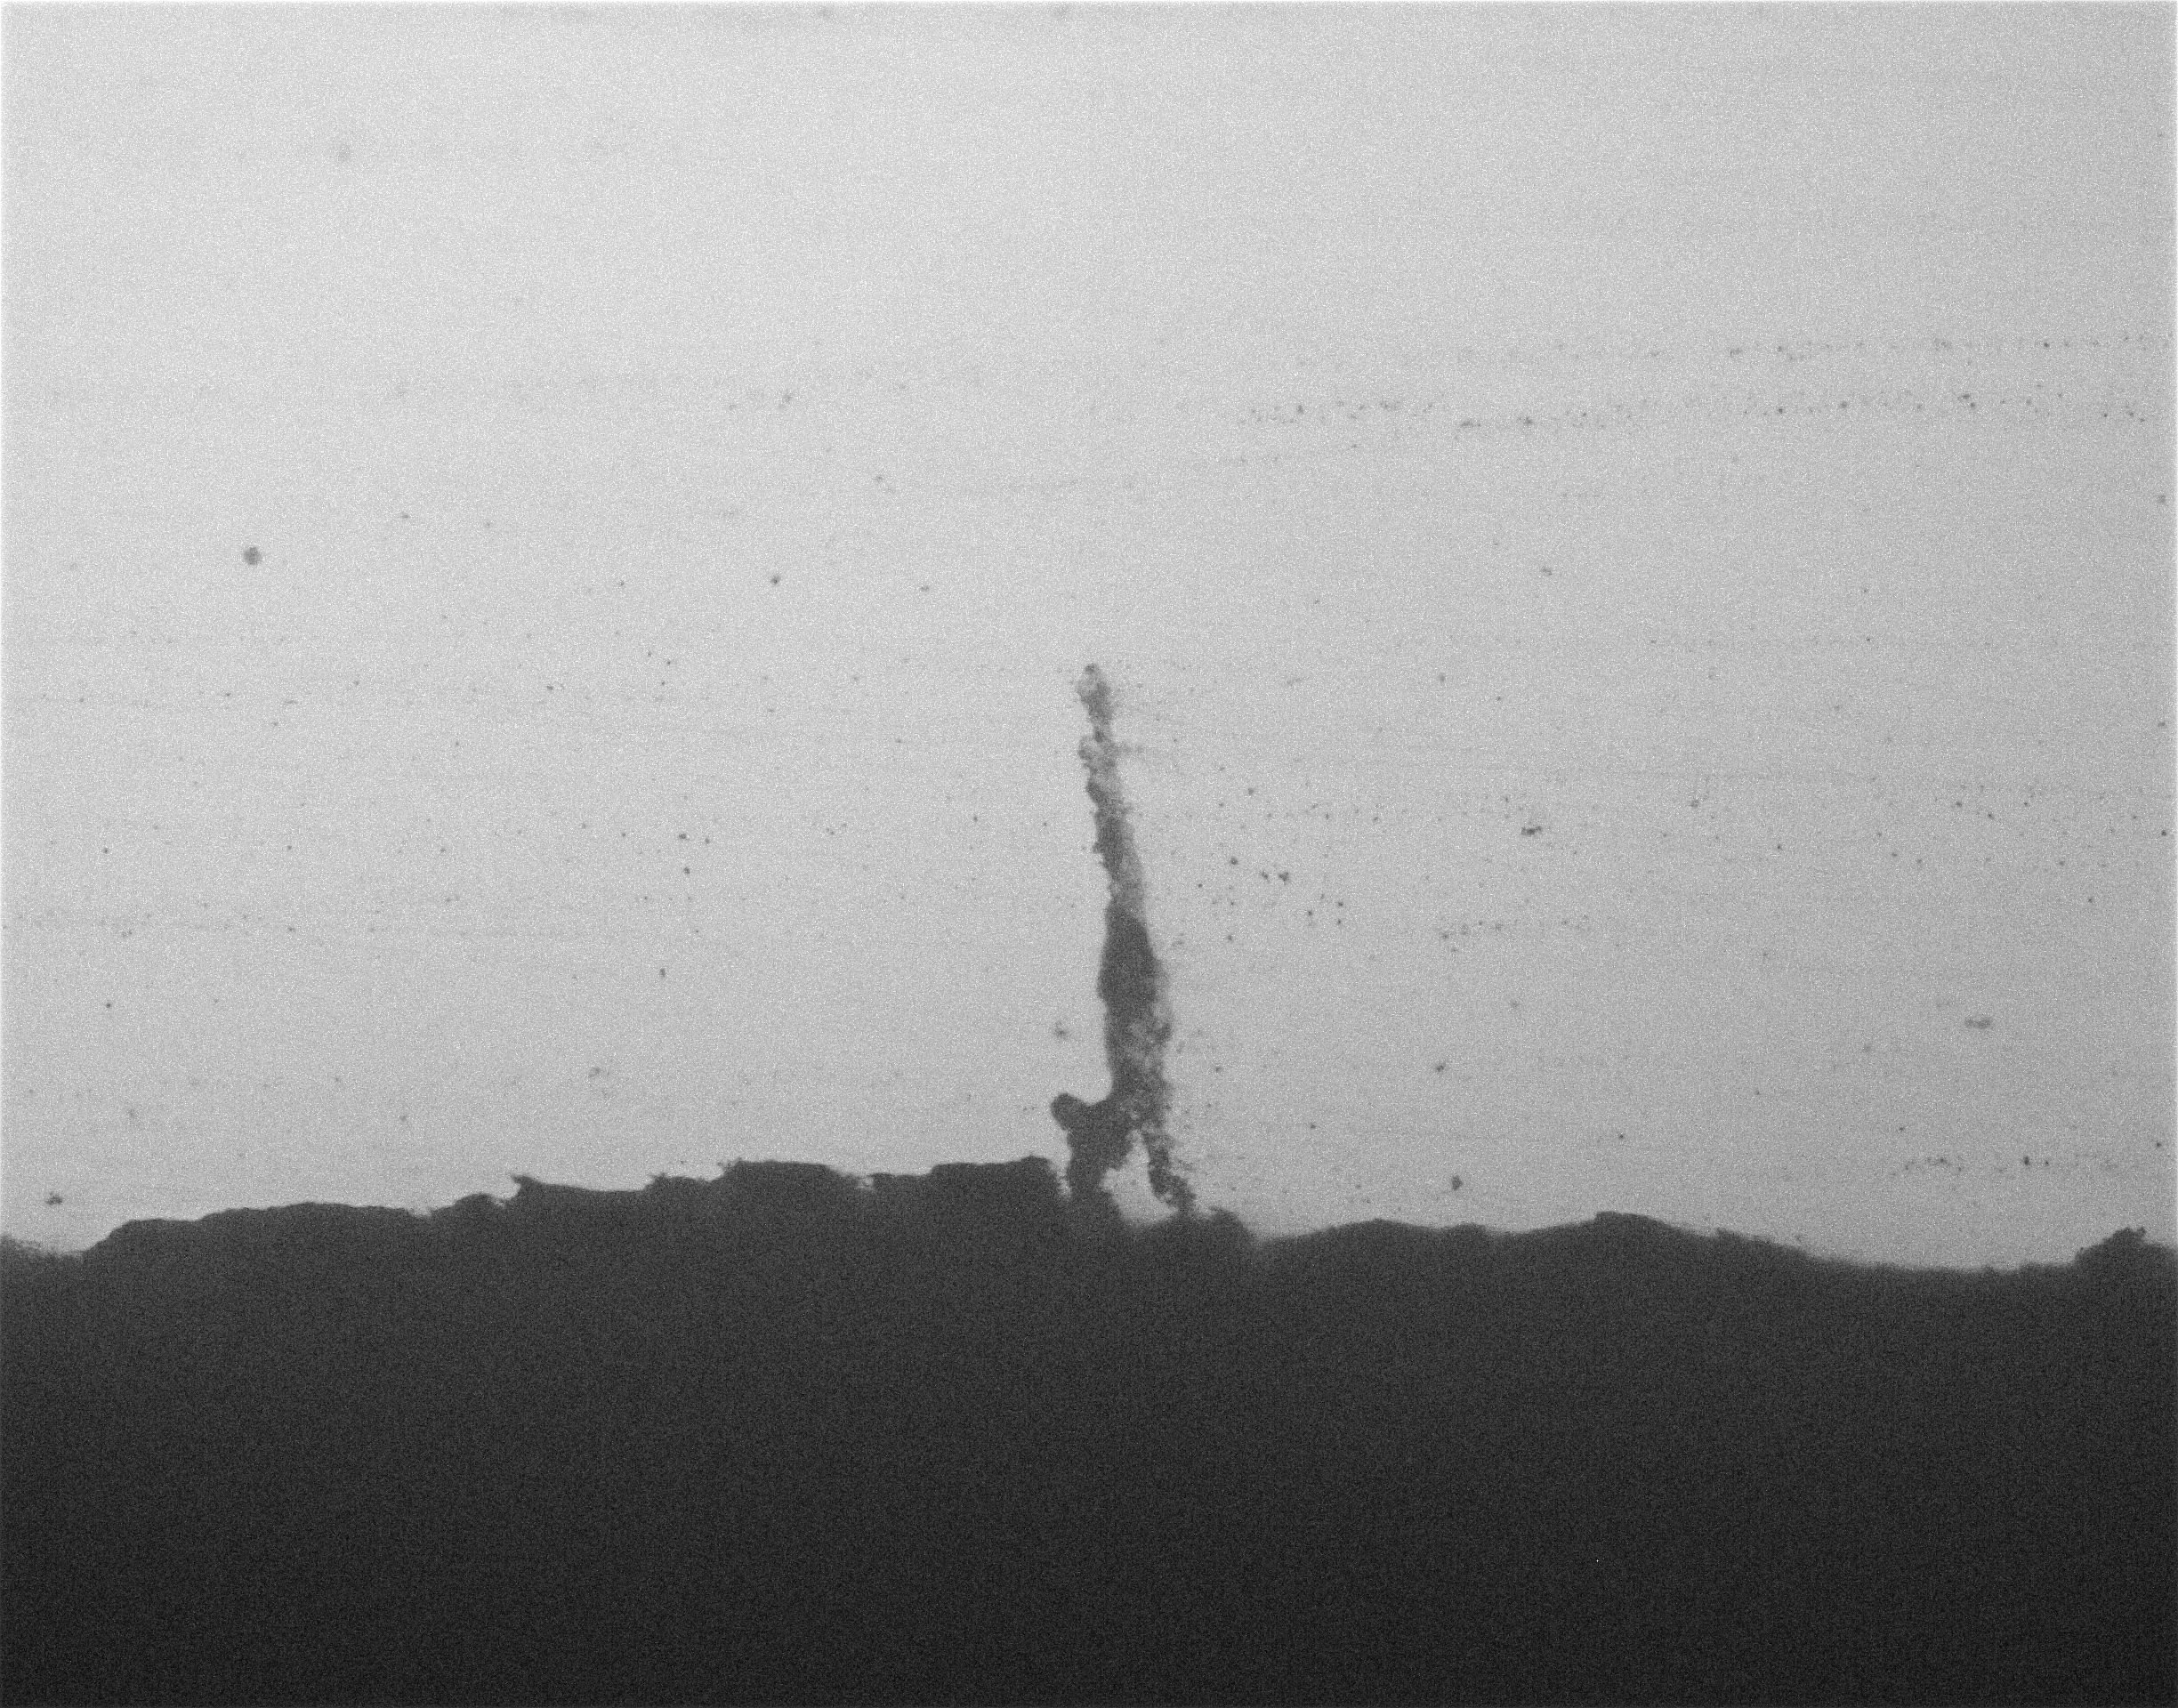

Supplement: f1 [file 2382759.f1.zip › Figure11.Magnifiedmicro-morphologyofsmallcracksinfractureoriginarea.JPG]

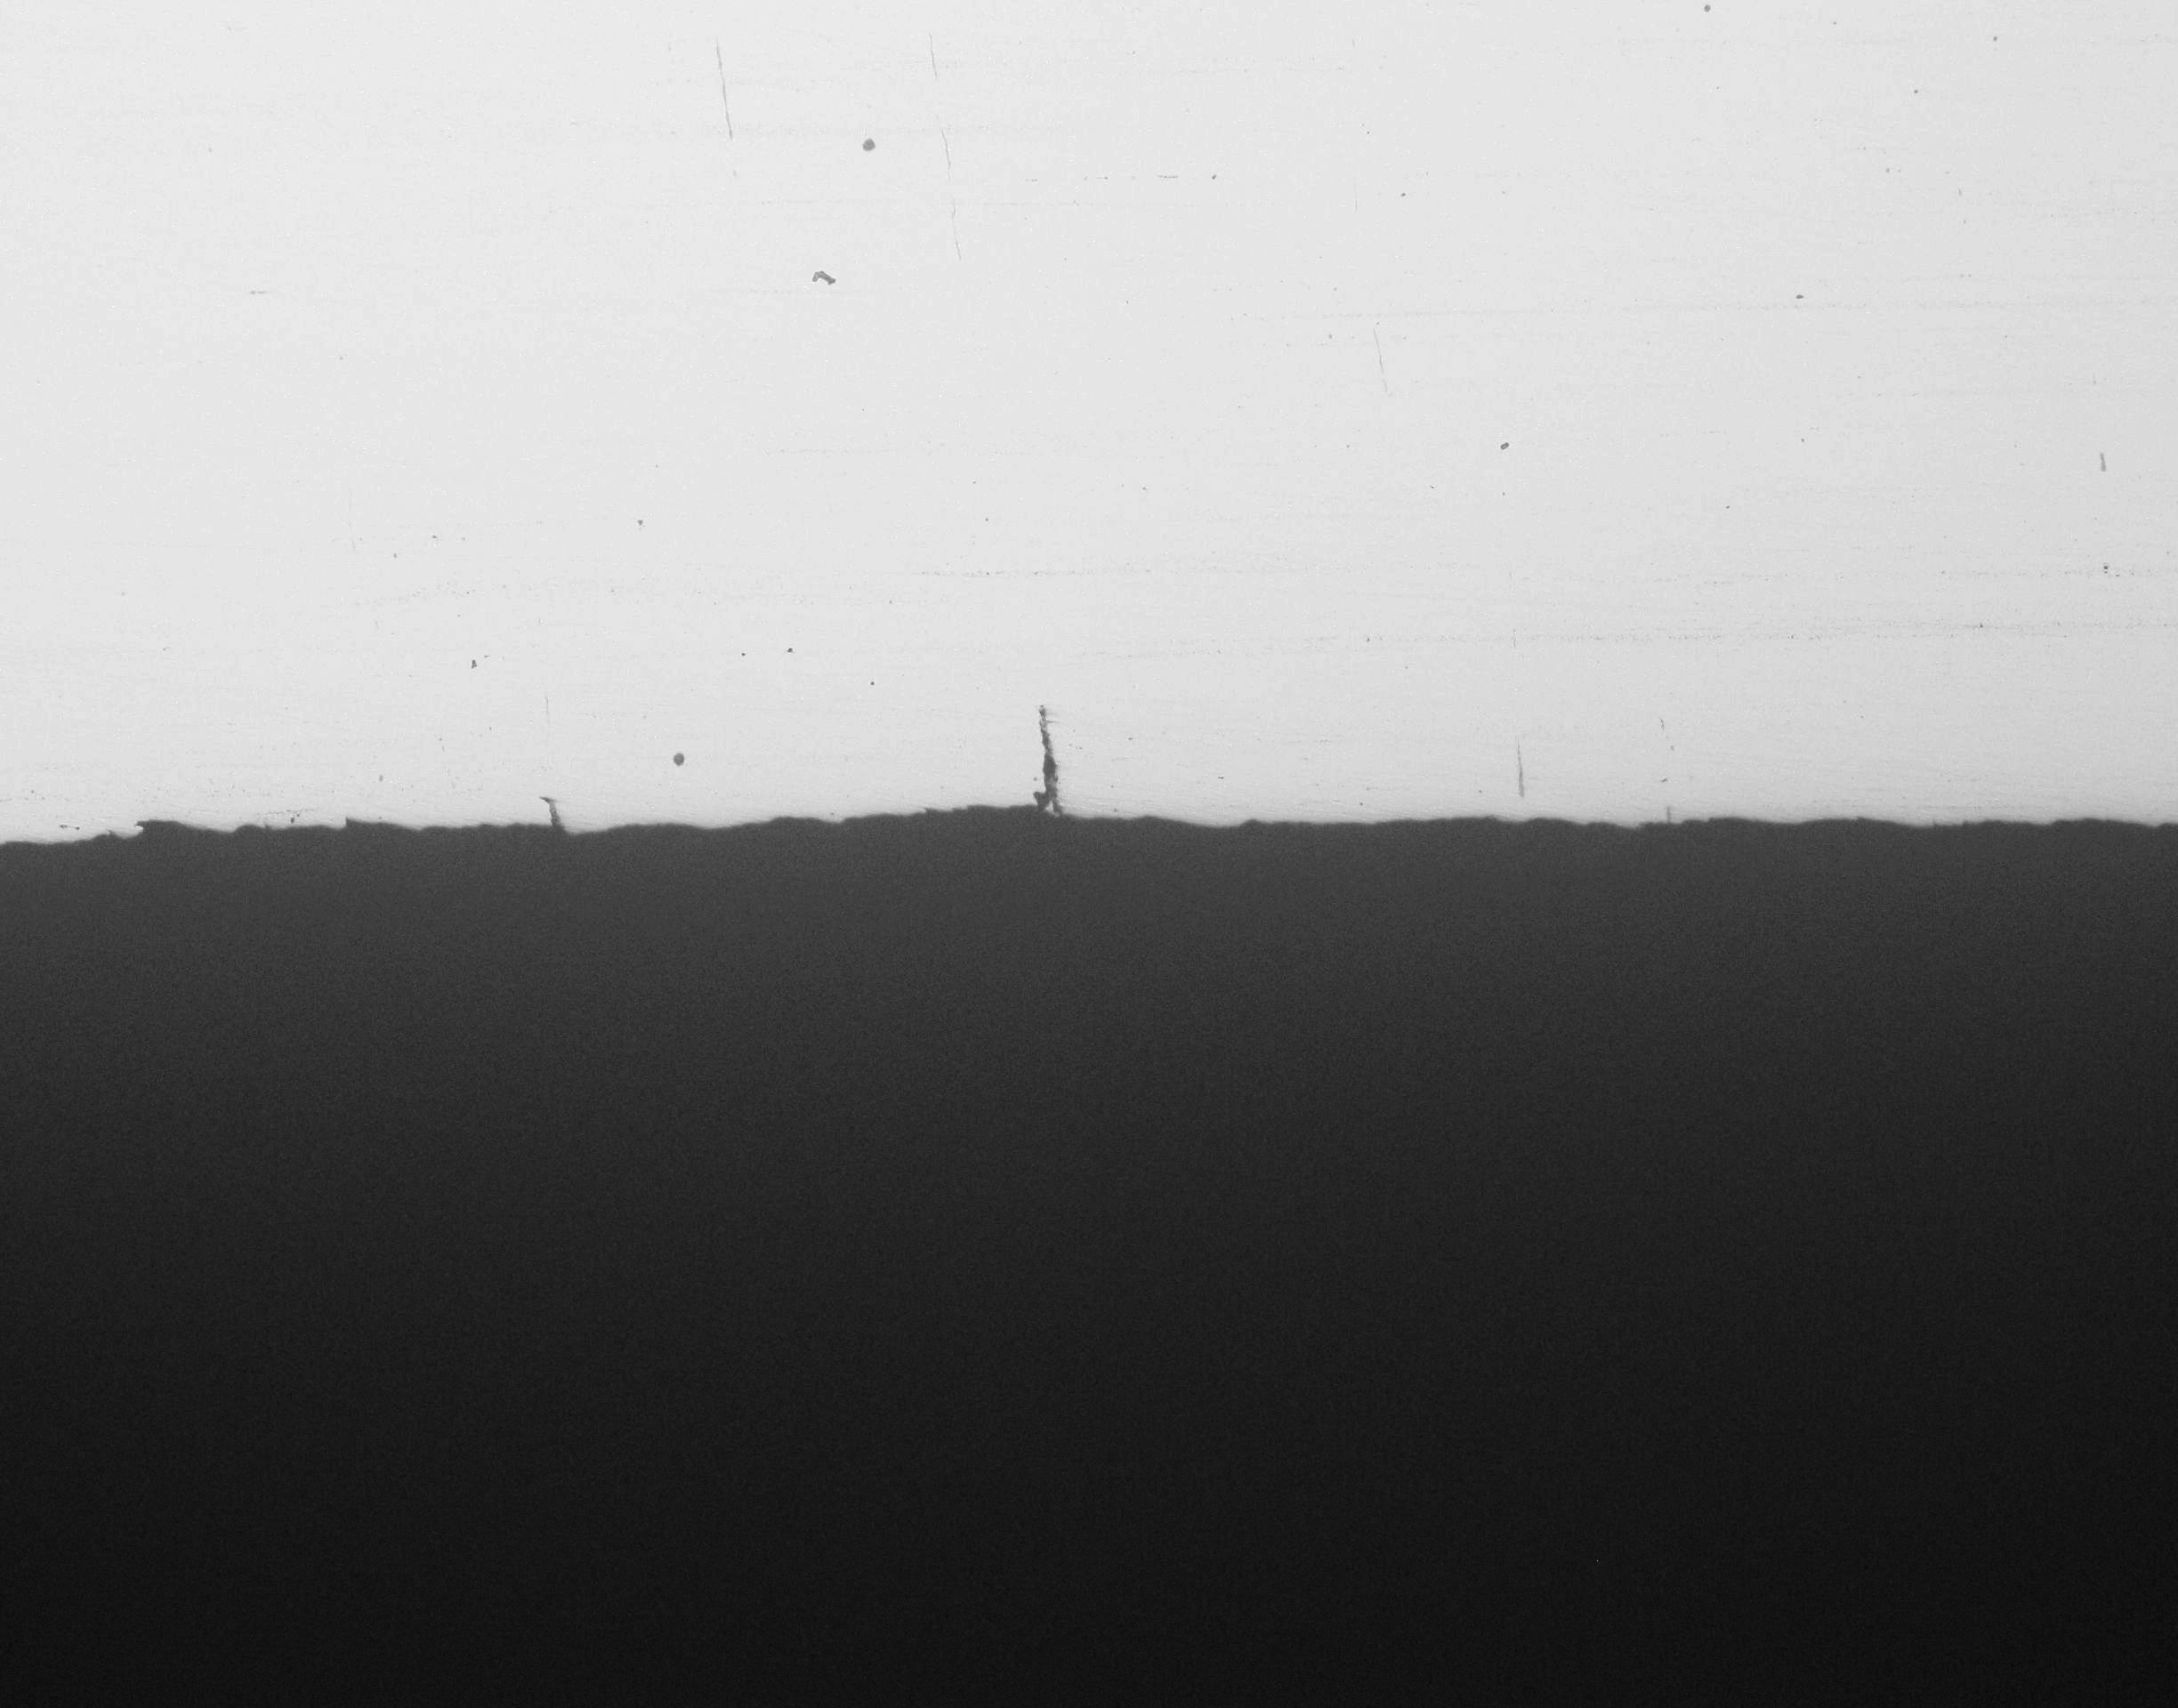

Supplement: f1 [file 2382759.f1.zip › Figure10.Micro-morphologyofsmallcracksdistributedinfractureoriginarea.JPG]

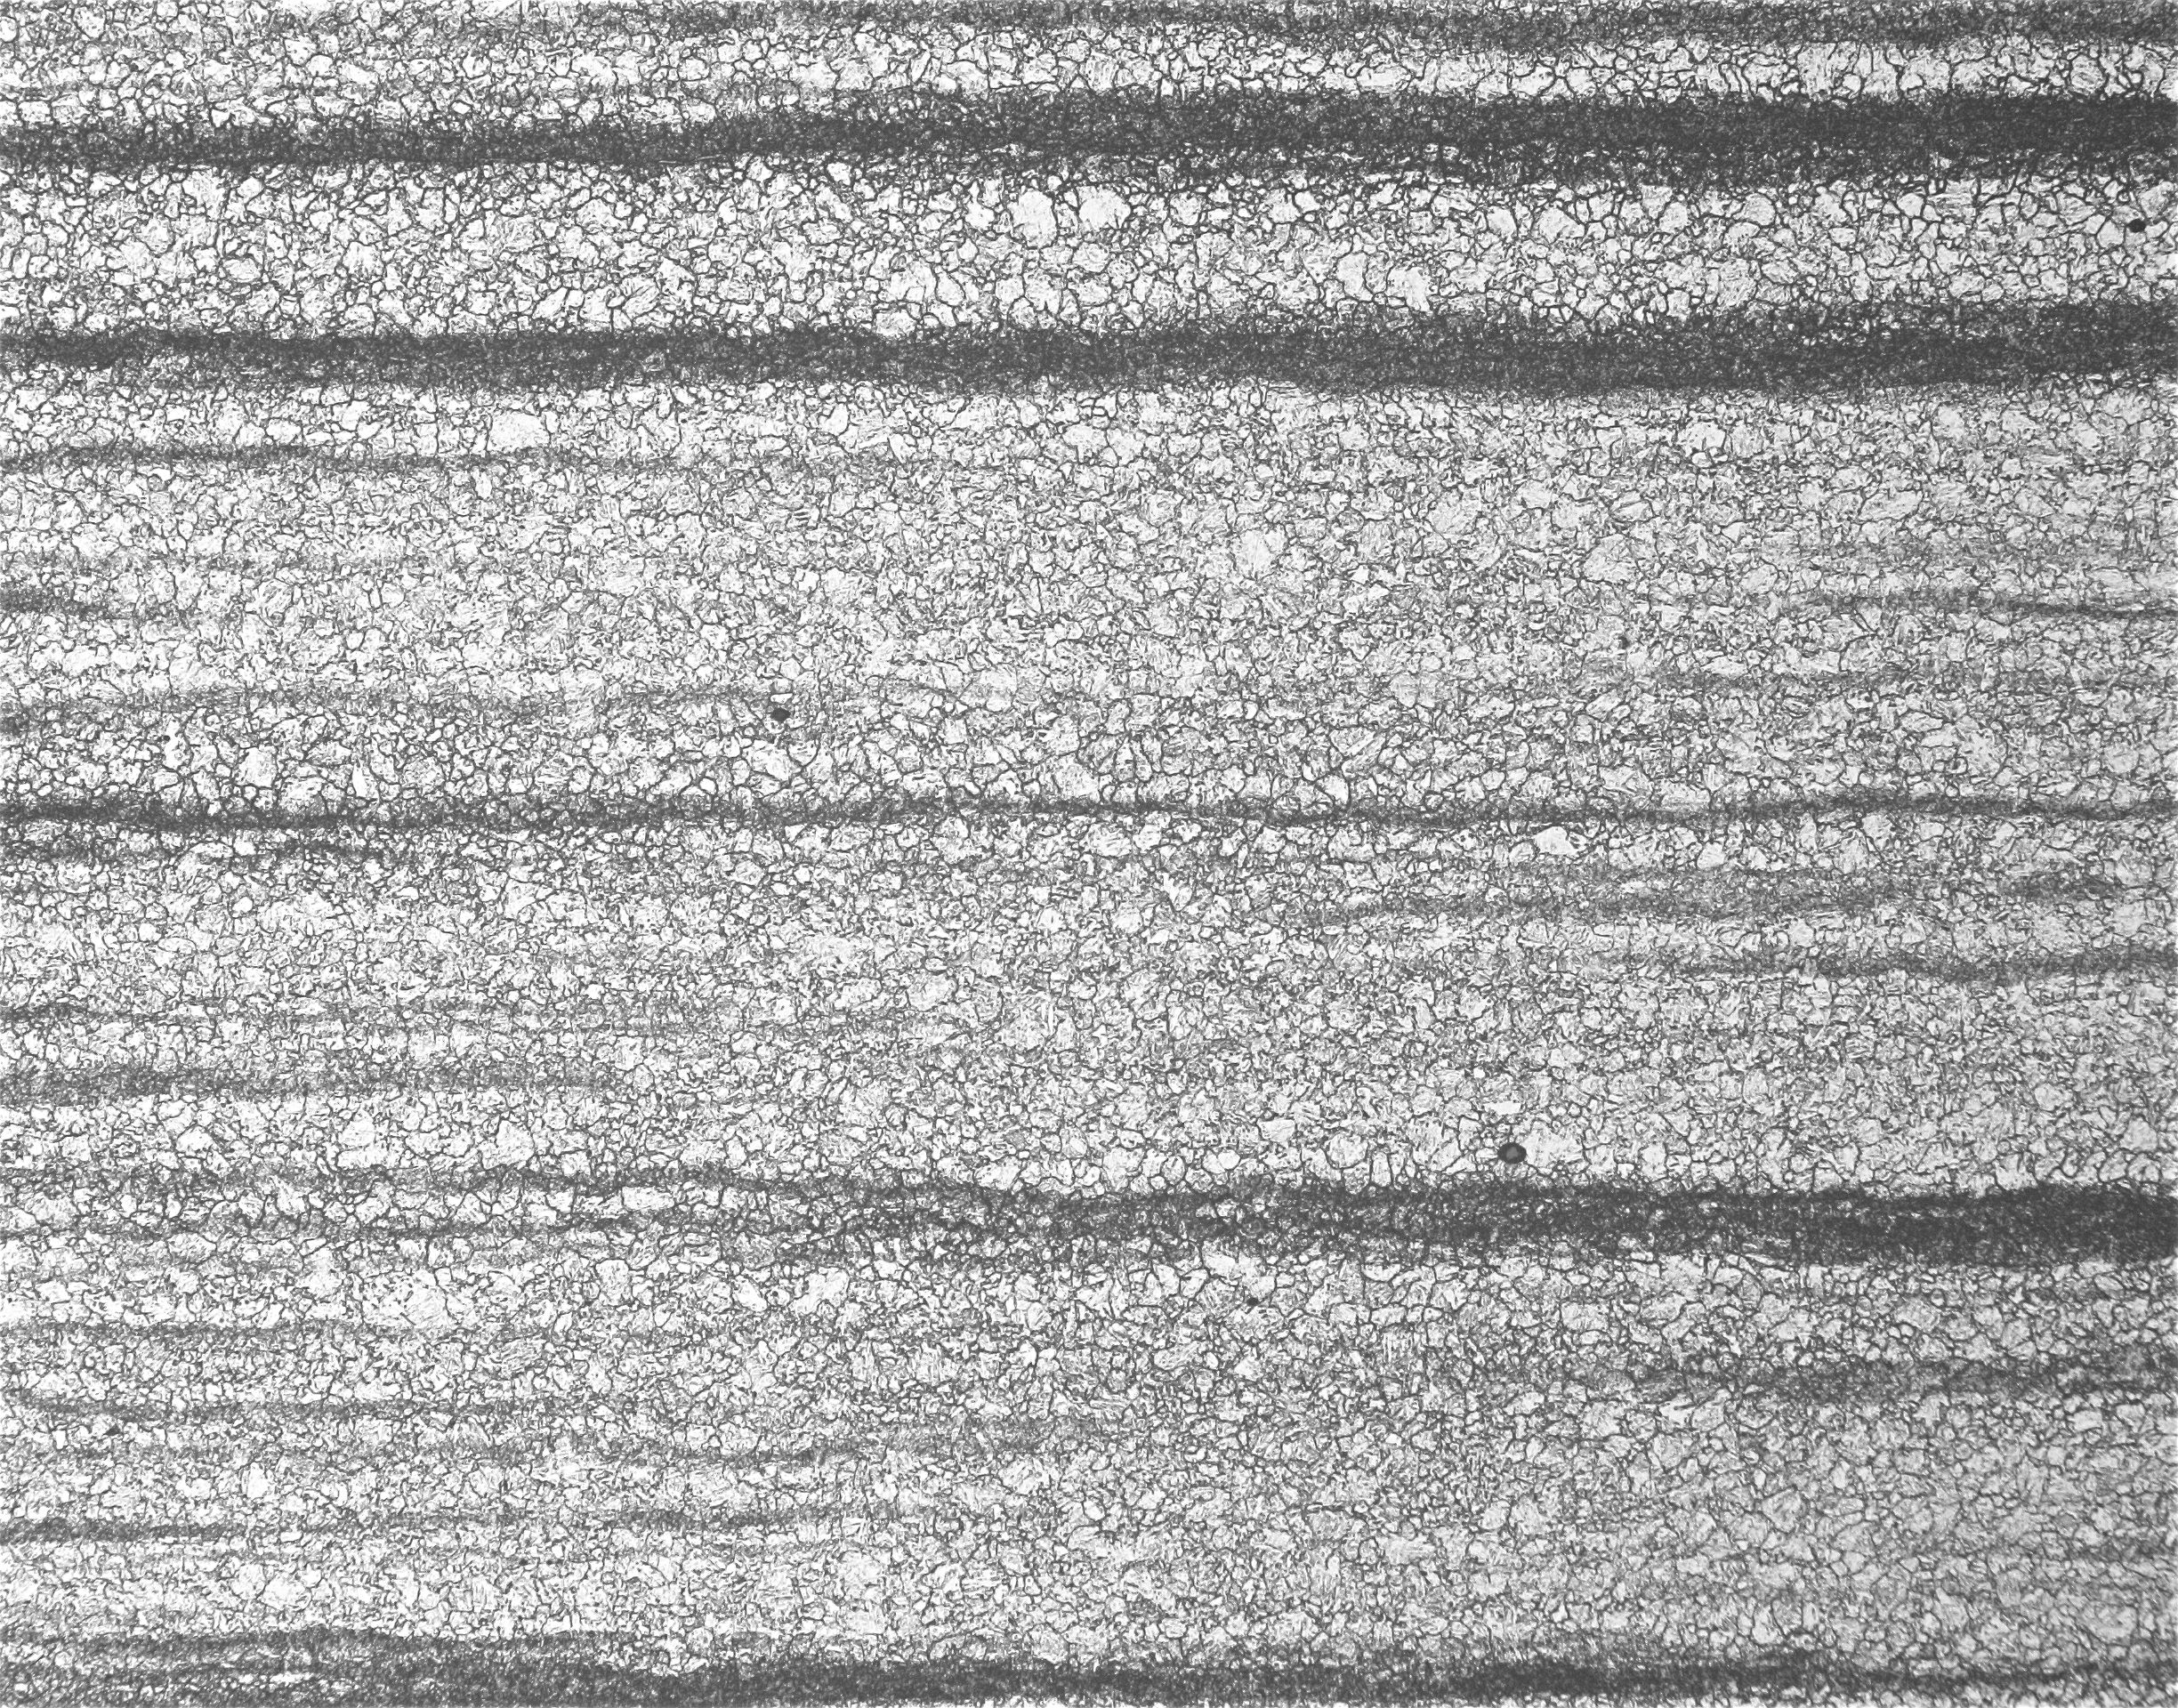

Supplement: f1 [file 2382759.f1.zip › Figure5.Grainsizeofboltmatrix.JPG]

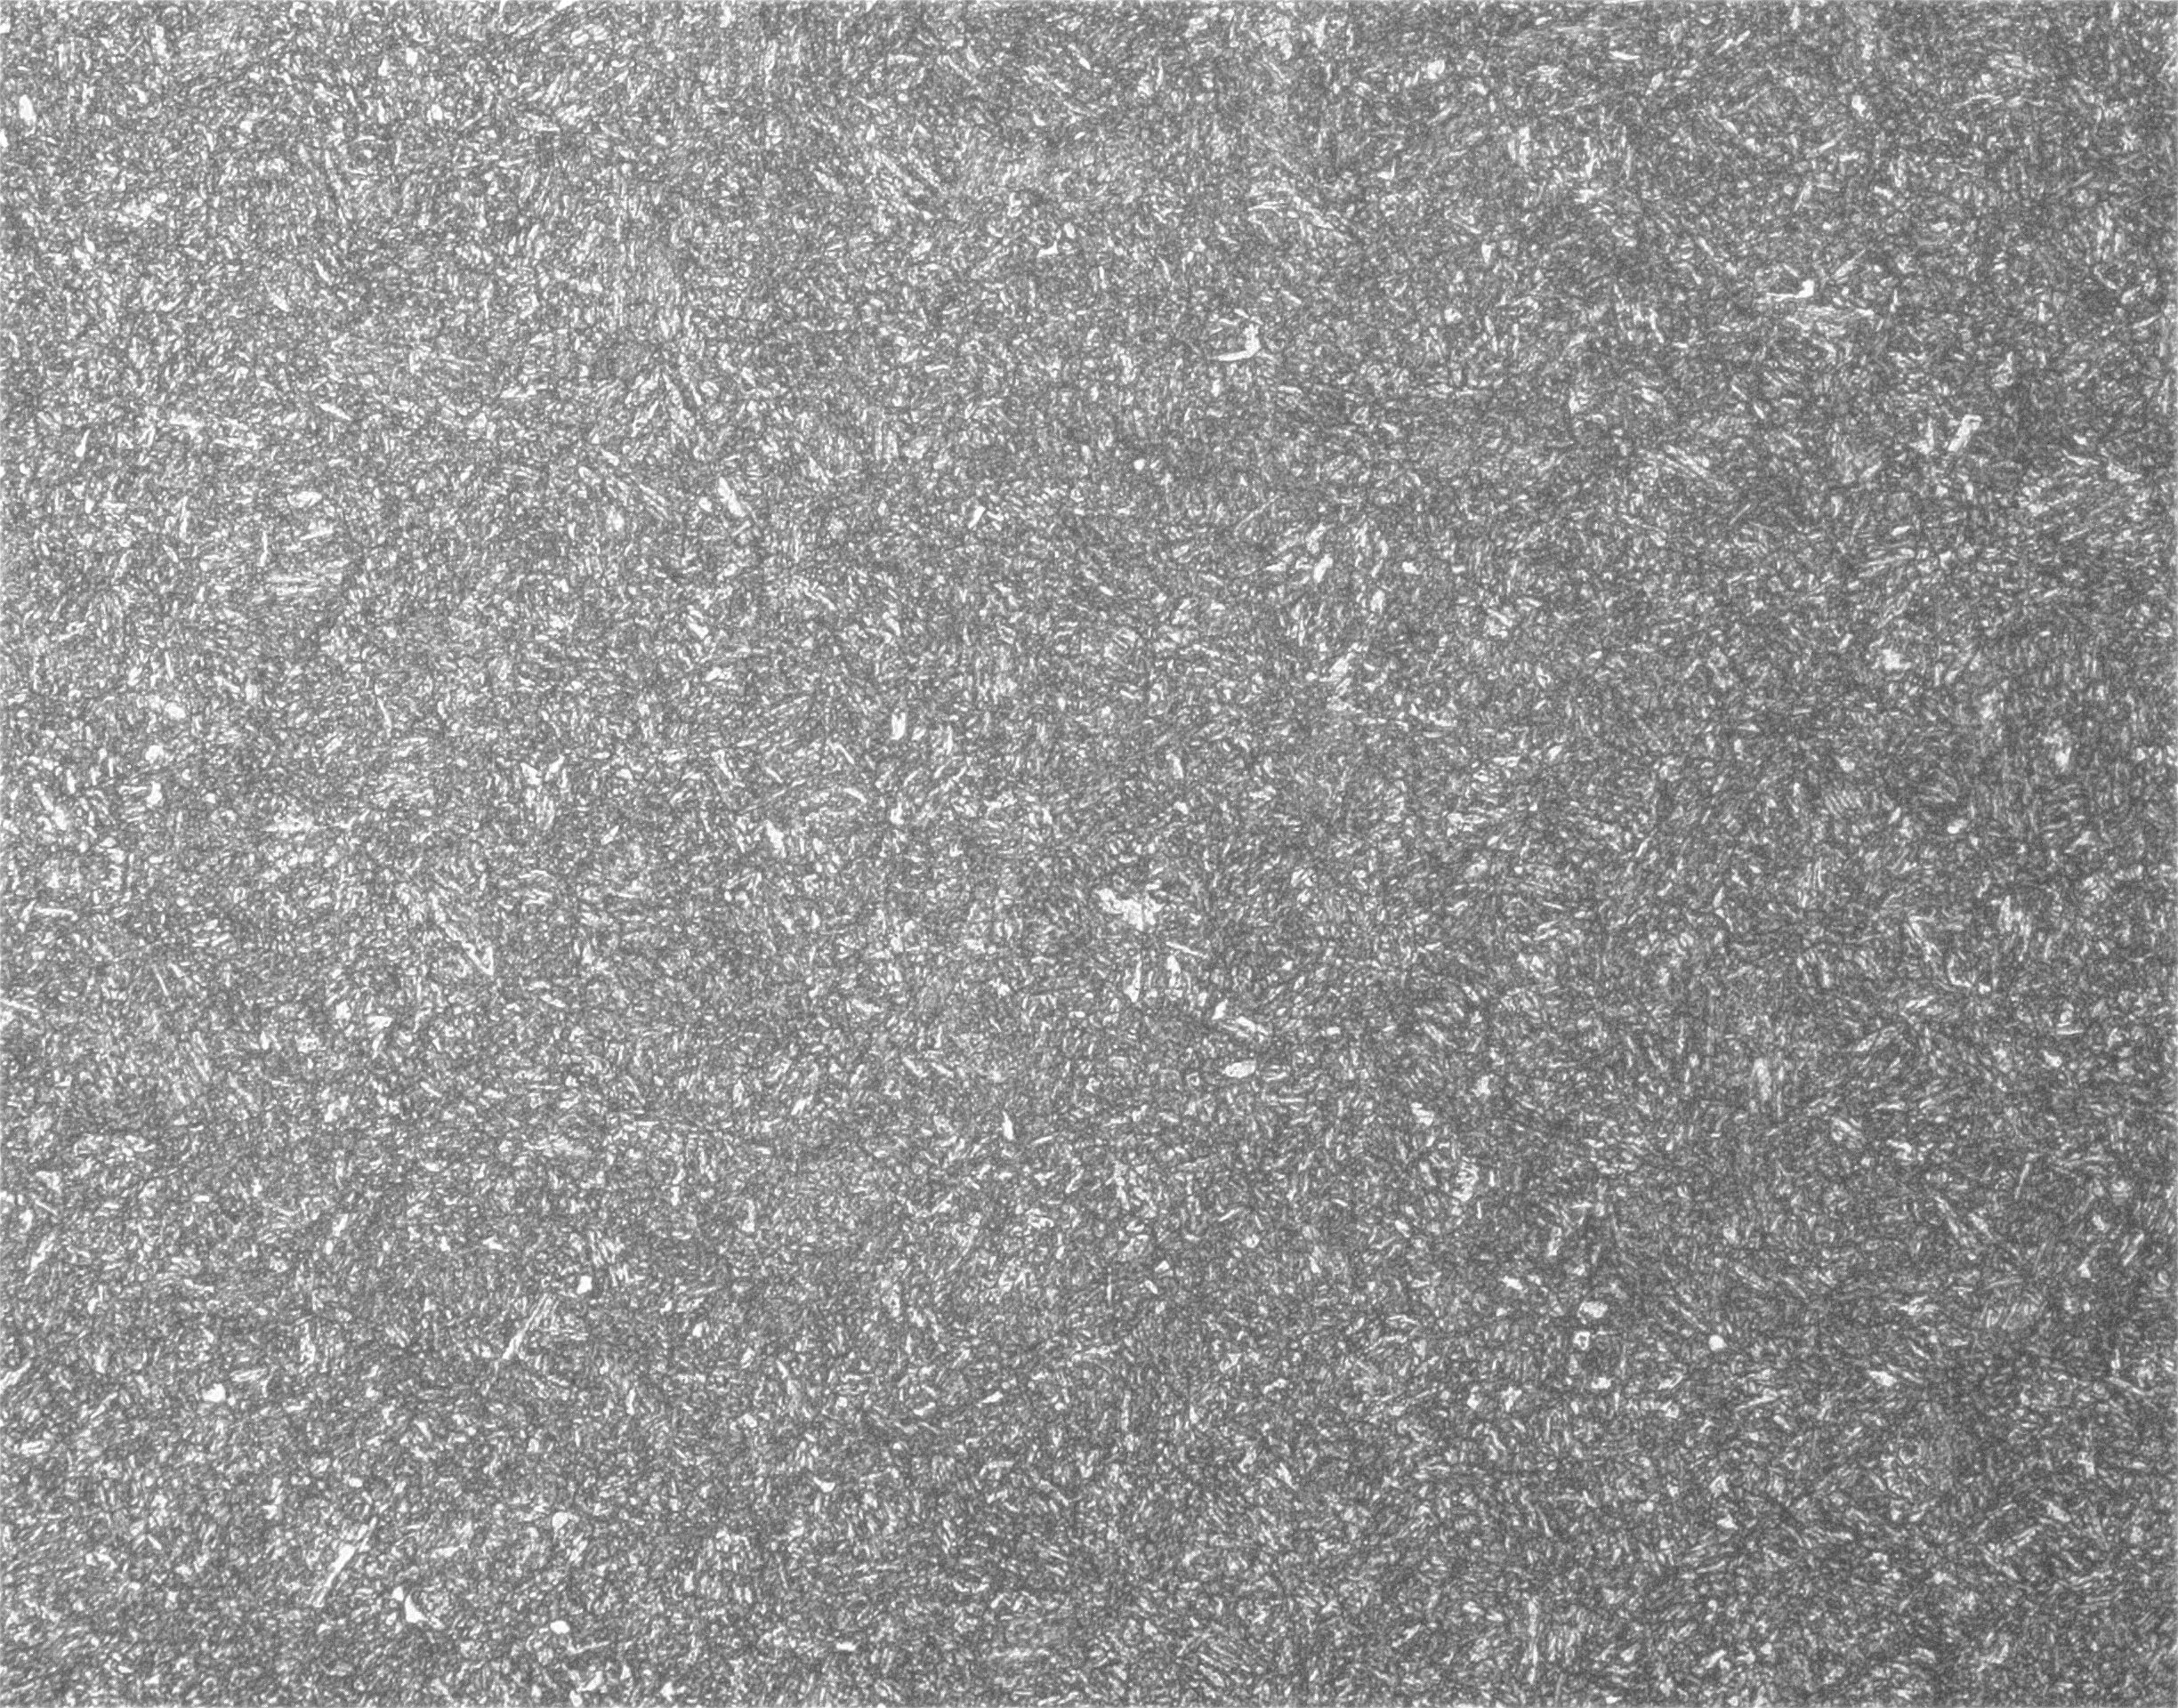

Supplement: f1 [file 2382759.f1.zip › Figure4.Metallographicstructureofboltmatrix.JPG]

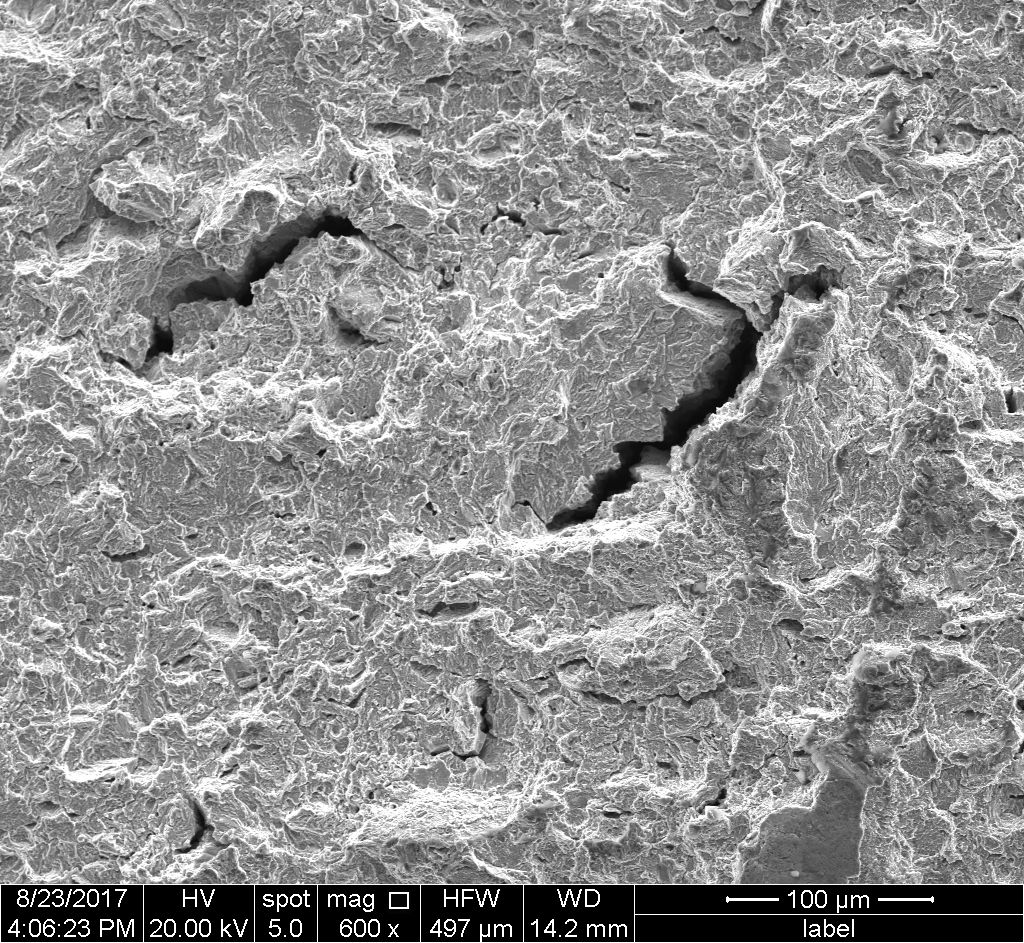

Supplement: f1 [file 2382759.f1.zip › Figure8.Macro-morphologyofsecondaryfracturecrack.jpg]

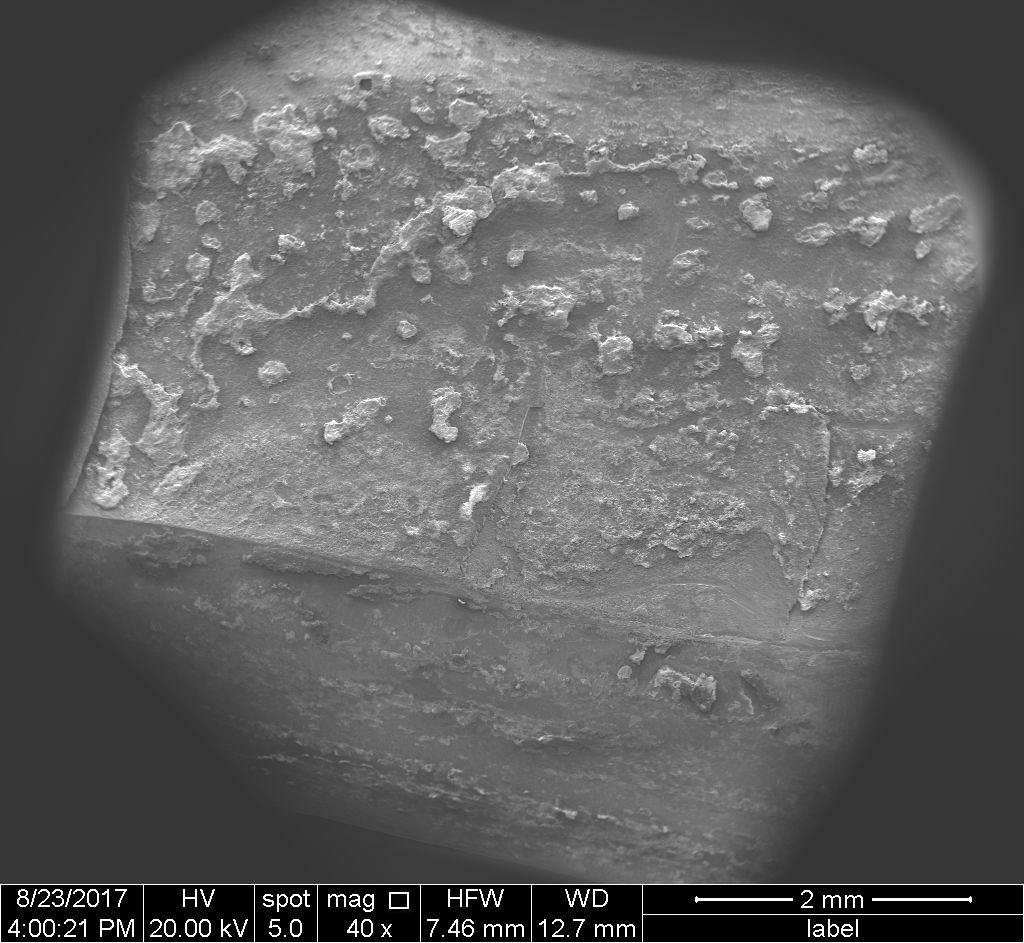

Supplement: f1 [file 2382759.f1.zip › Figure7Micro-morphologyoffractureextendedarea.jpg]

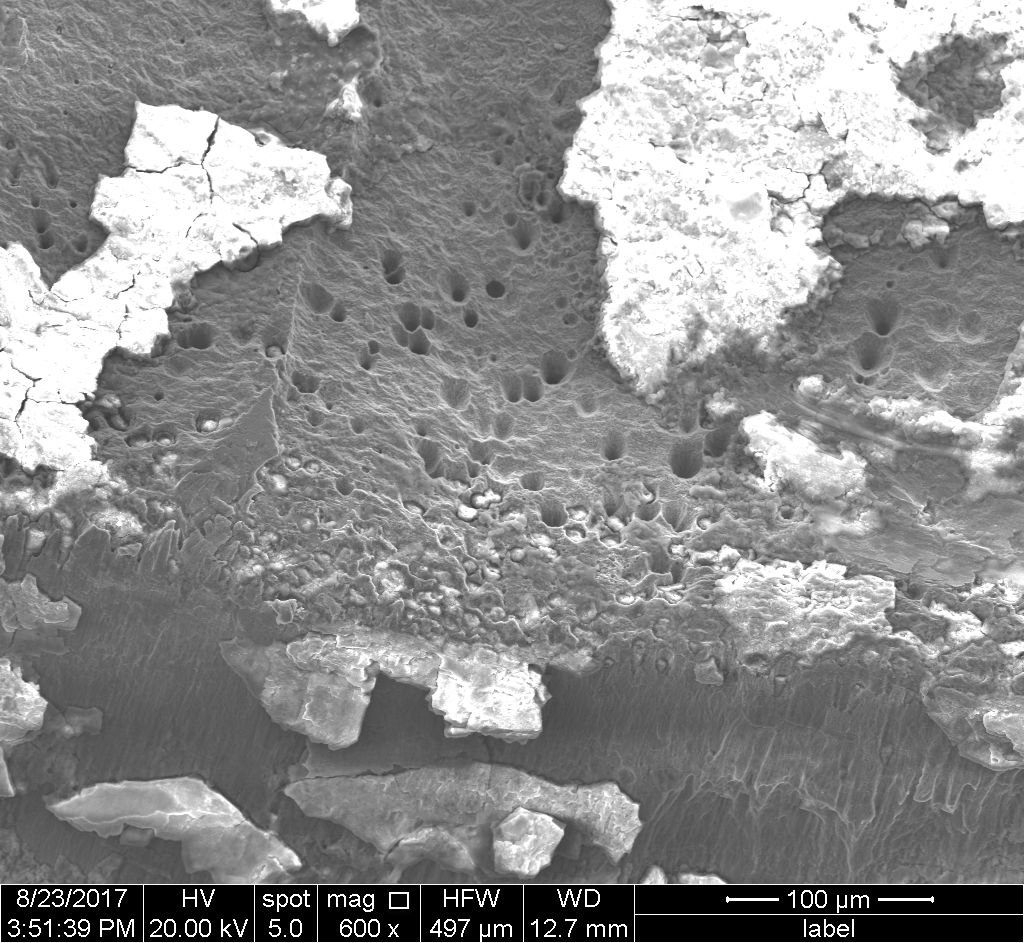

Supplement: f1 [file 2382759.f1.zip › Figure6Micro-morphologyoffractureoriginarea.jpg]

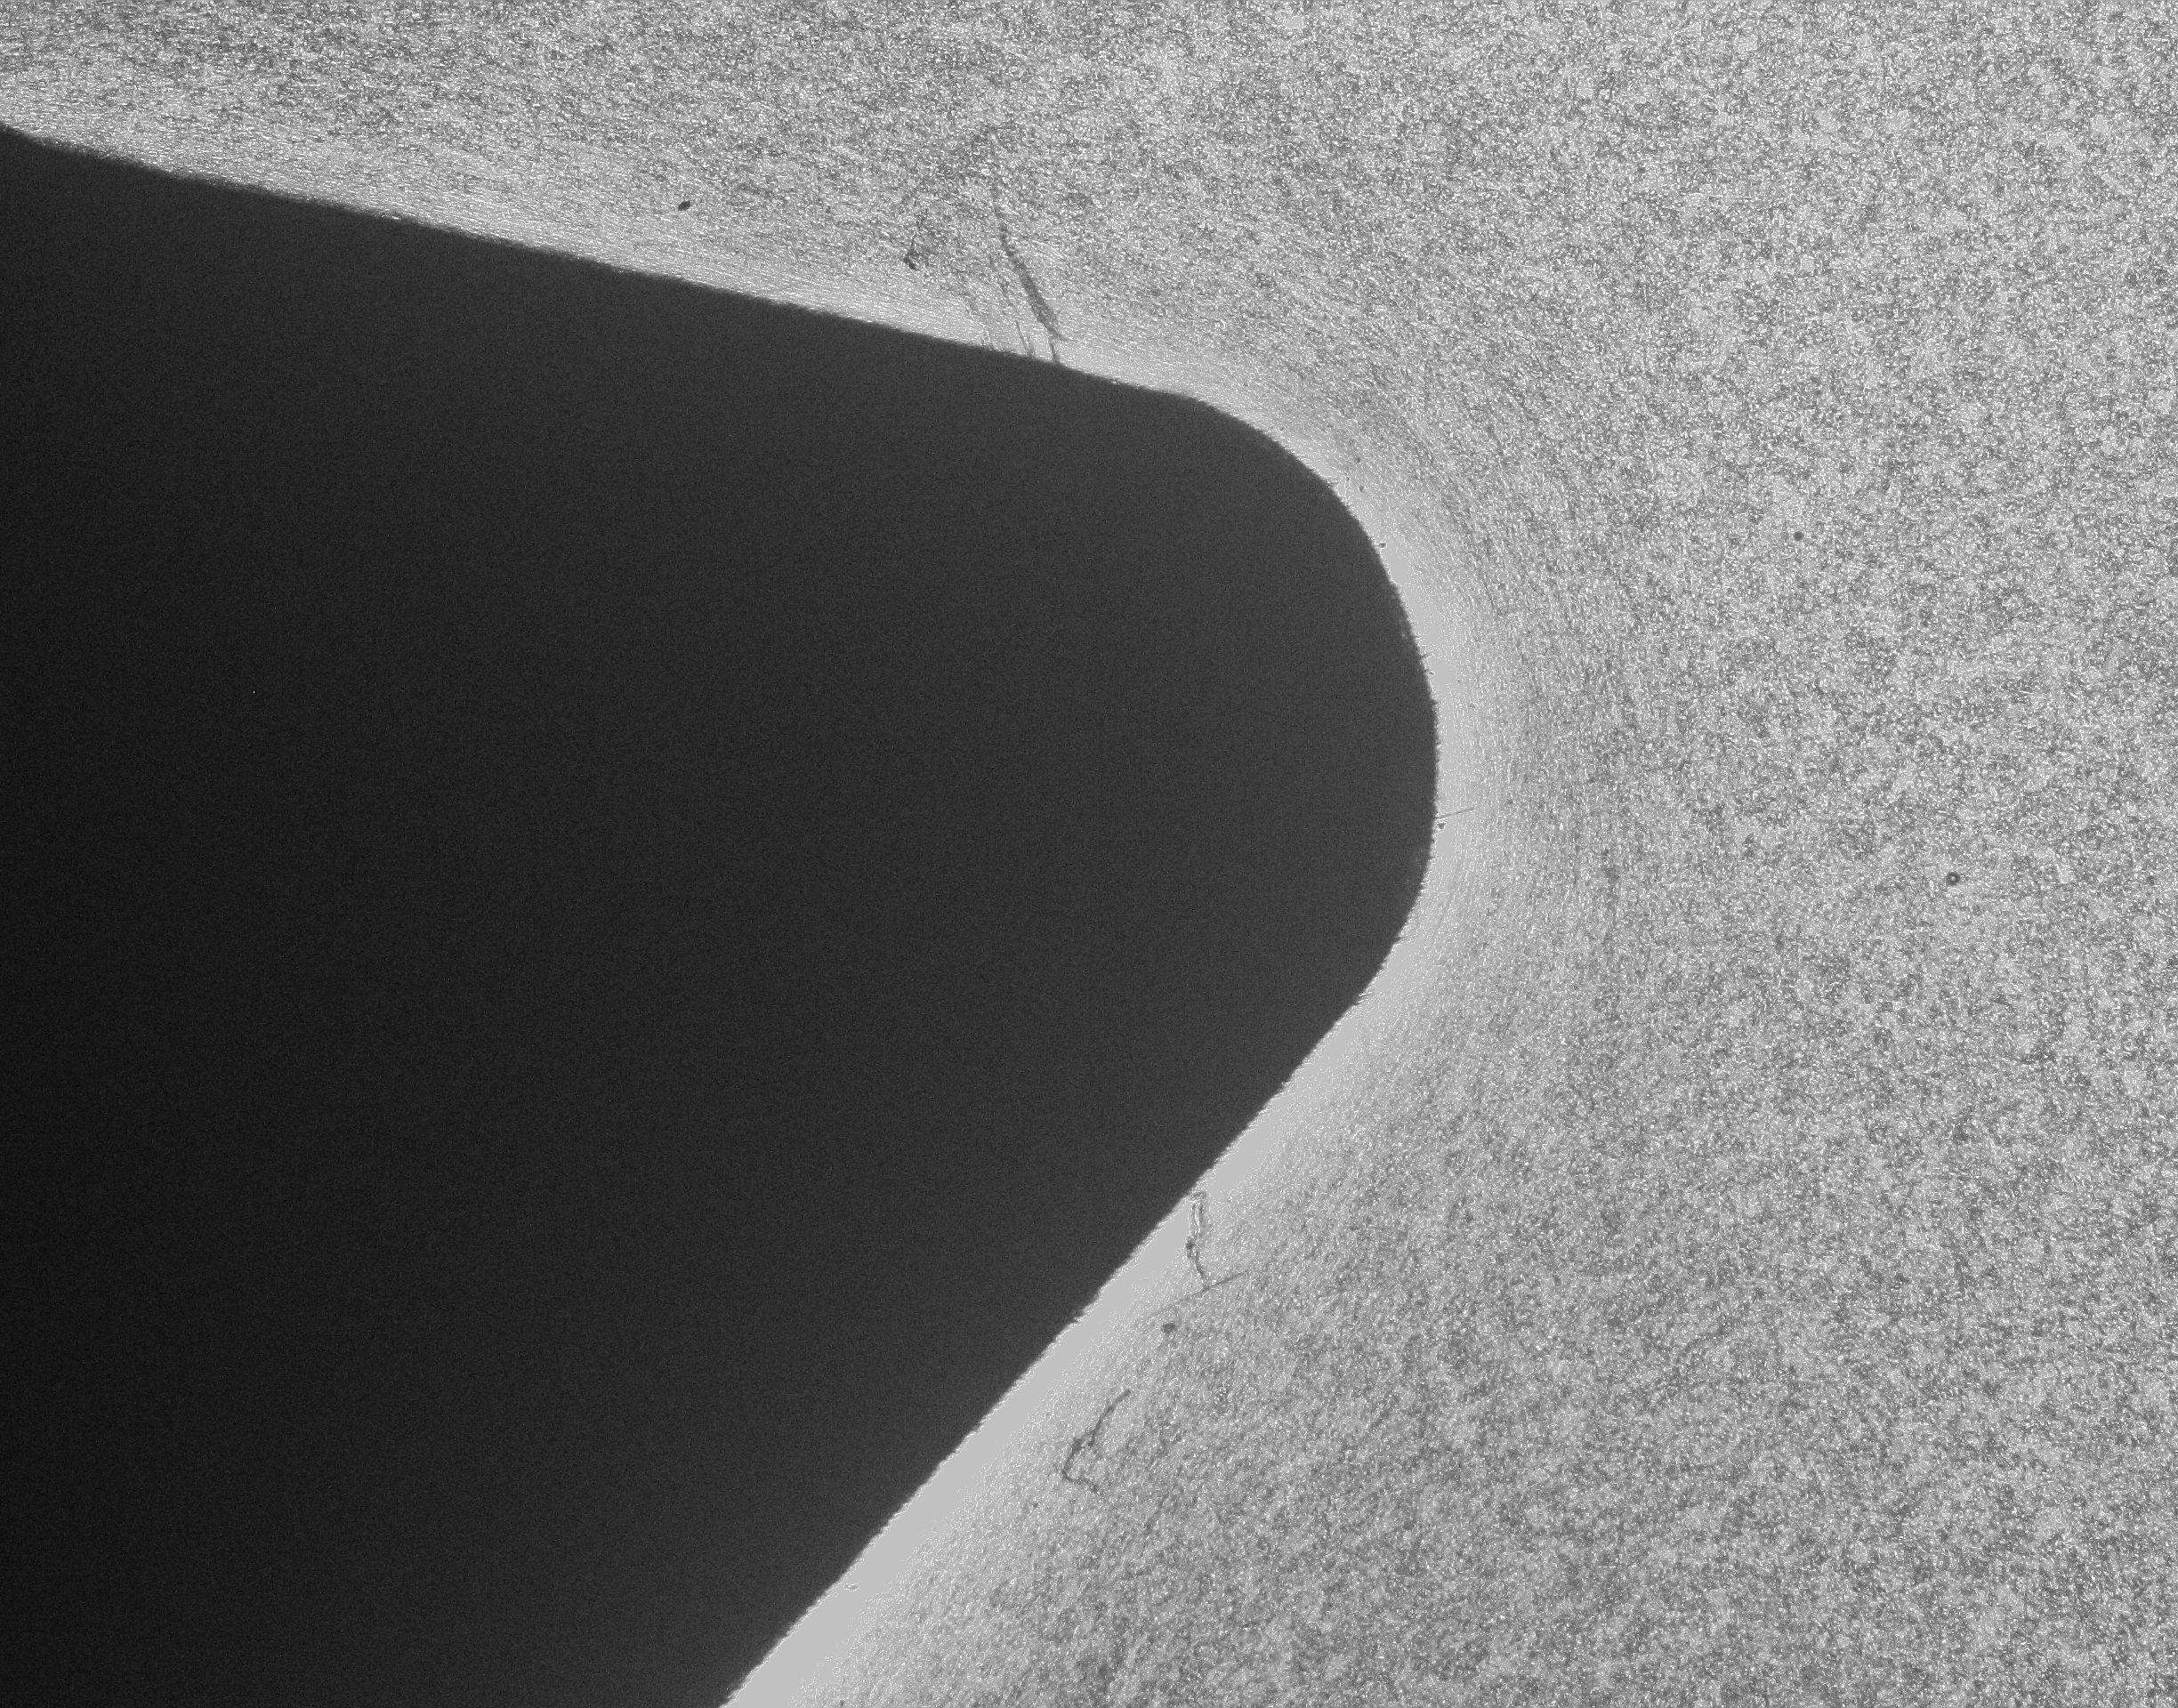

Supplement: f1 [file 2382759.f1.zip › Figure16.Micro-morphologyofcarbondepletionataddendumandbothtoothsidesofthebolt.JPG]

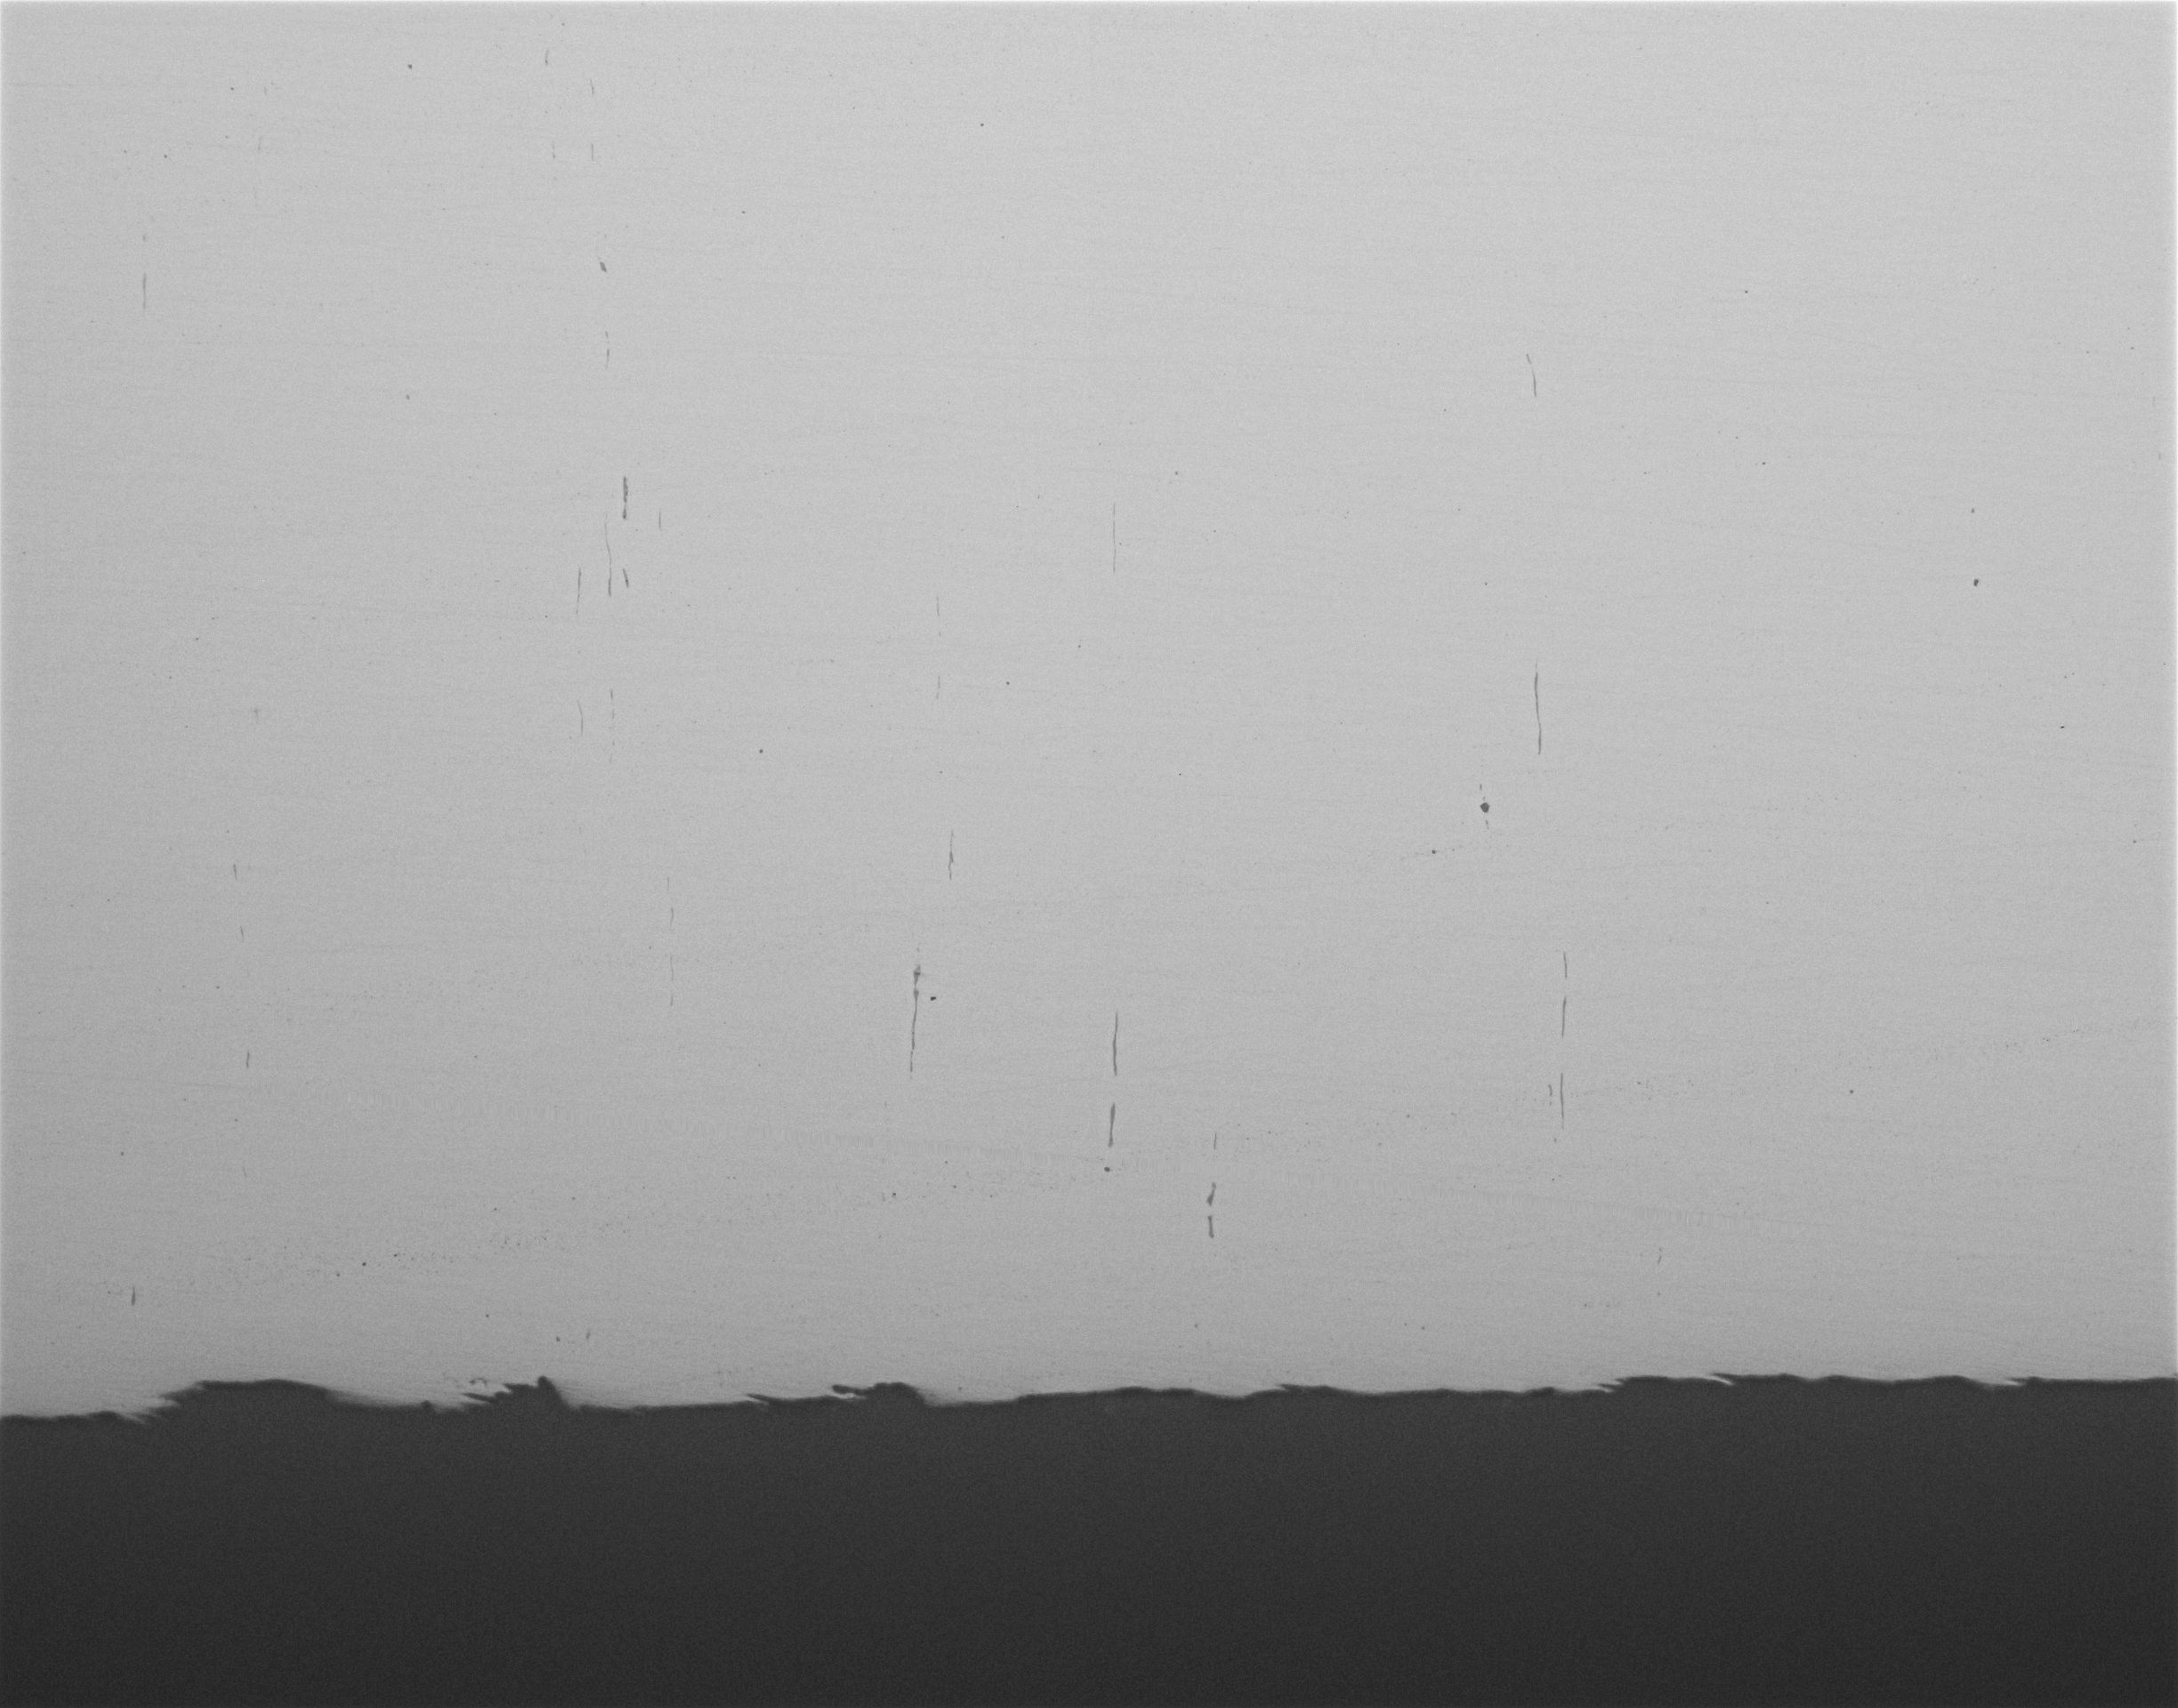

Supplement: f1 [file 2382759.f1.zip › Figure12.Micro-morphologyofnon-metallicinclusionsnearthefracturesurface.JPG]

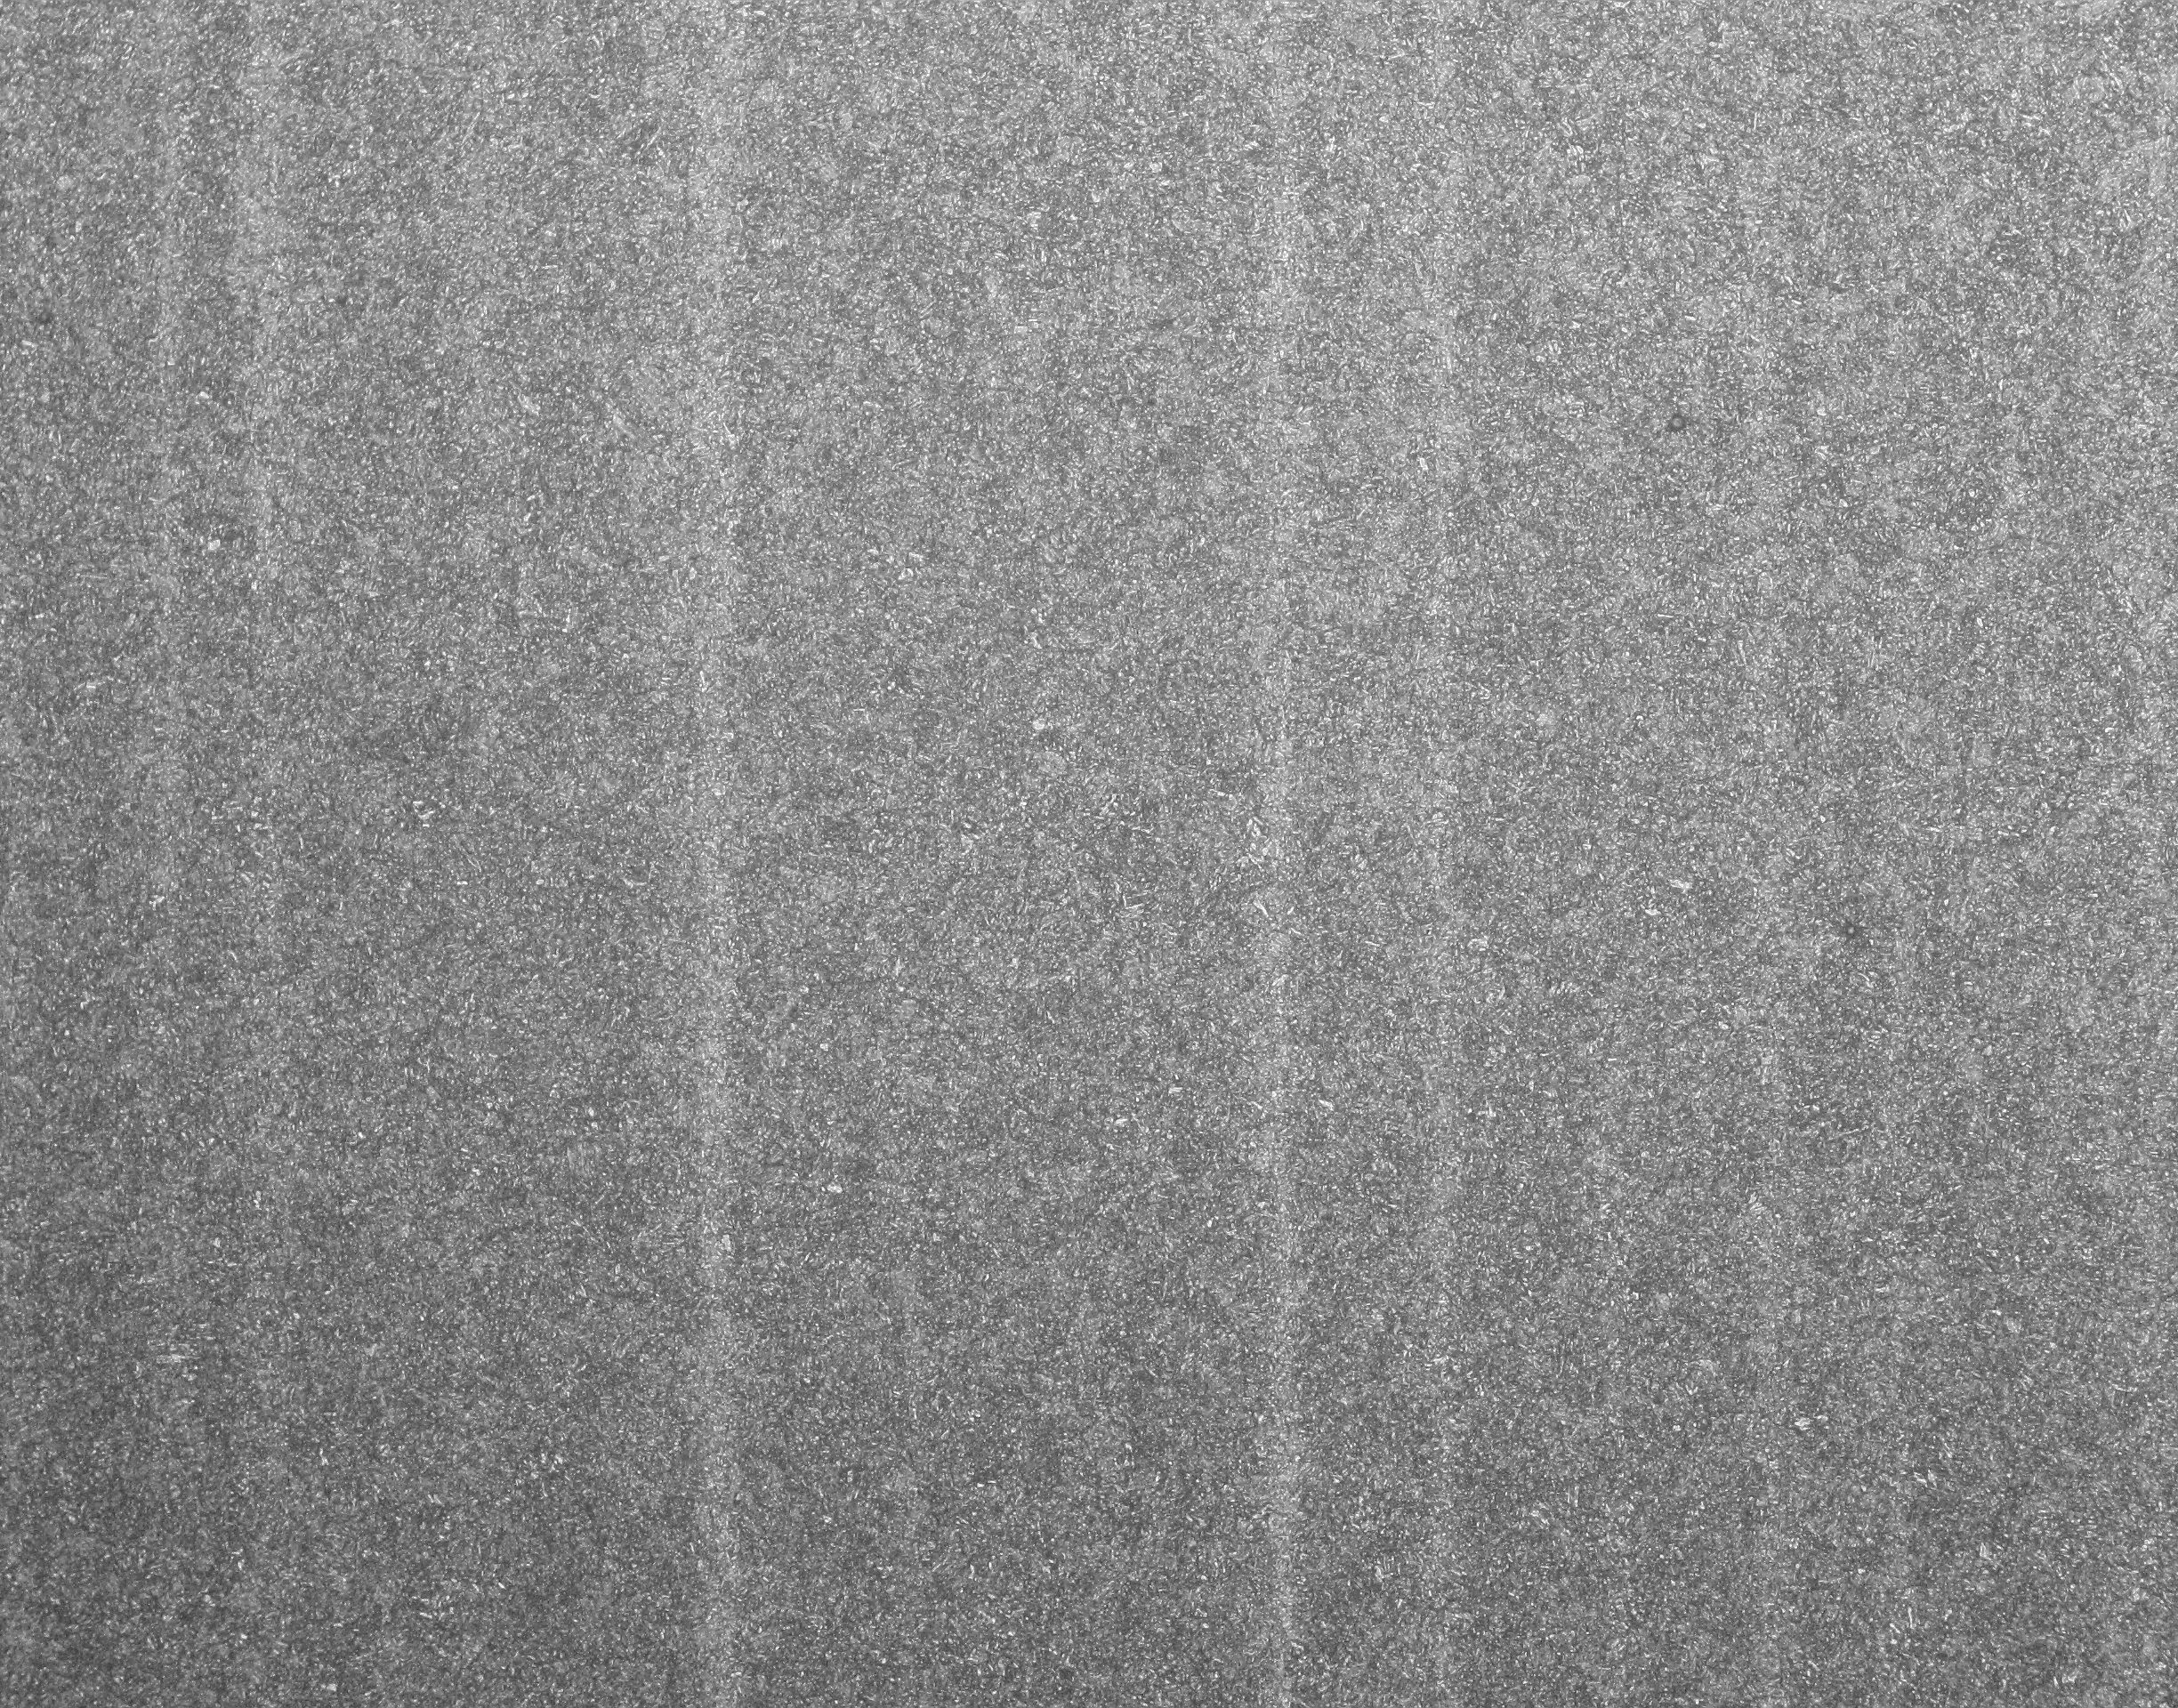

Supplement: f1 [file 2382759.f1.zip › Figure15.Micro-morphologyofthematrixband.JPG]

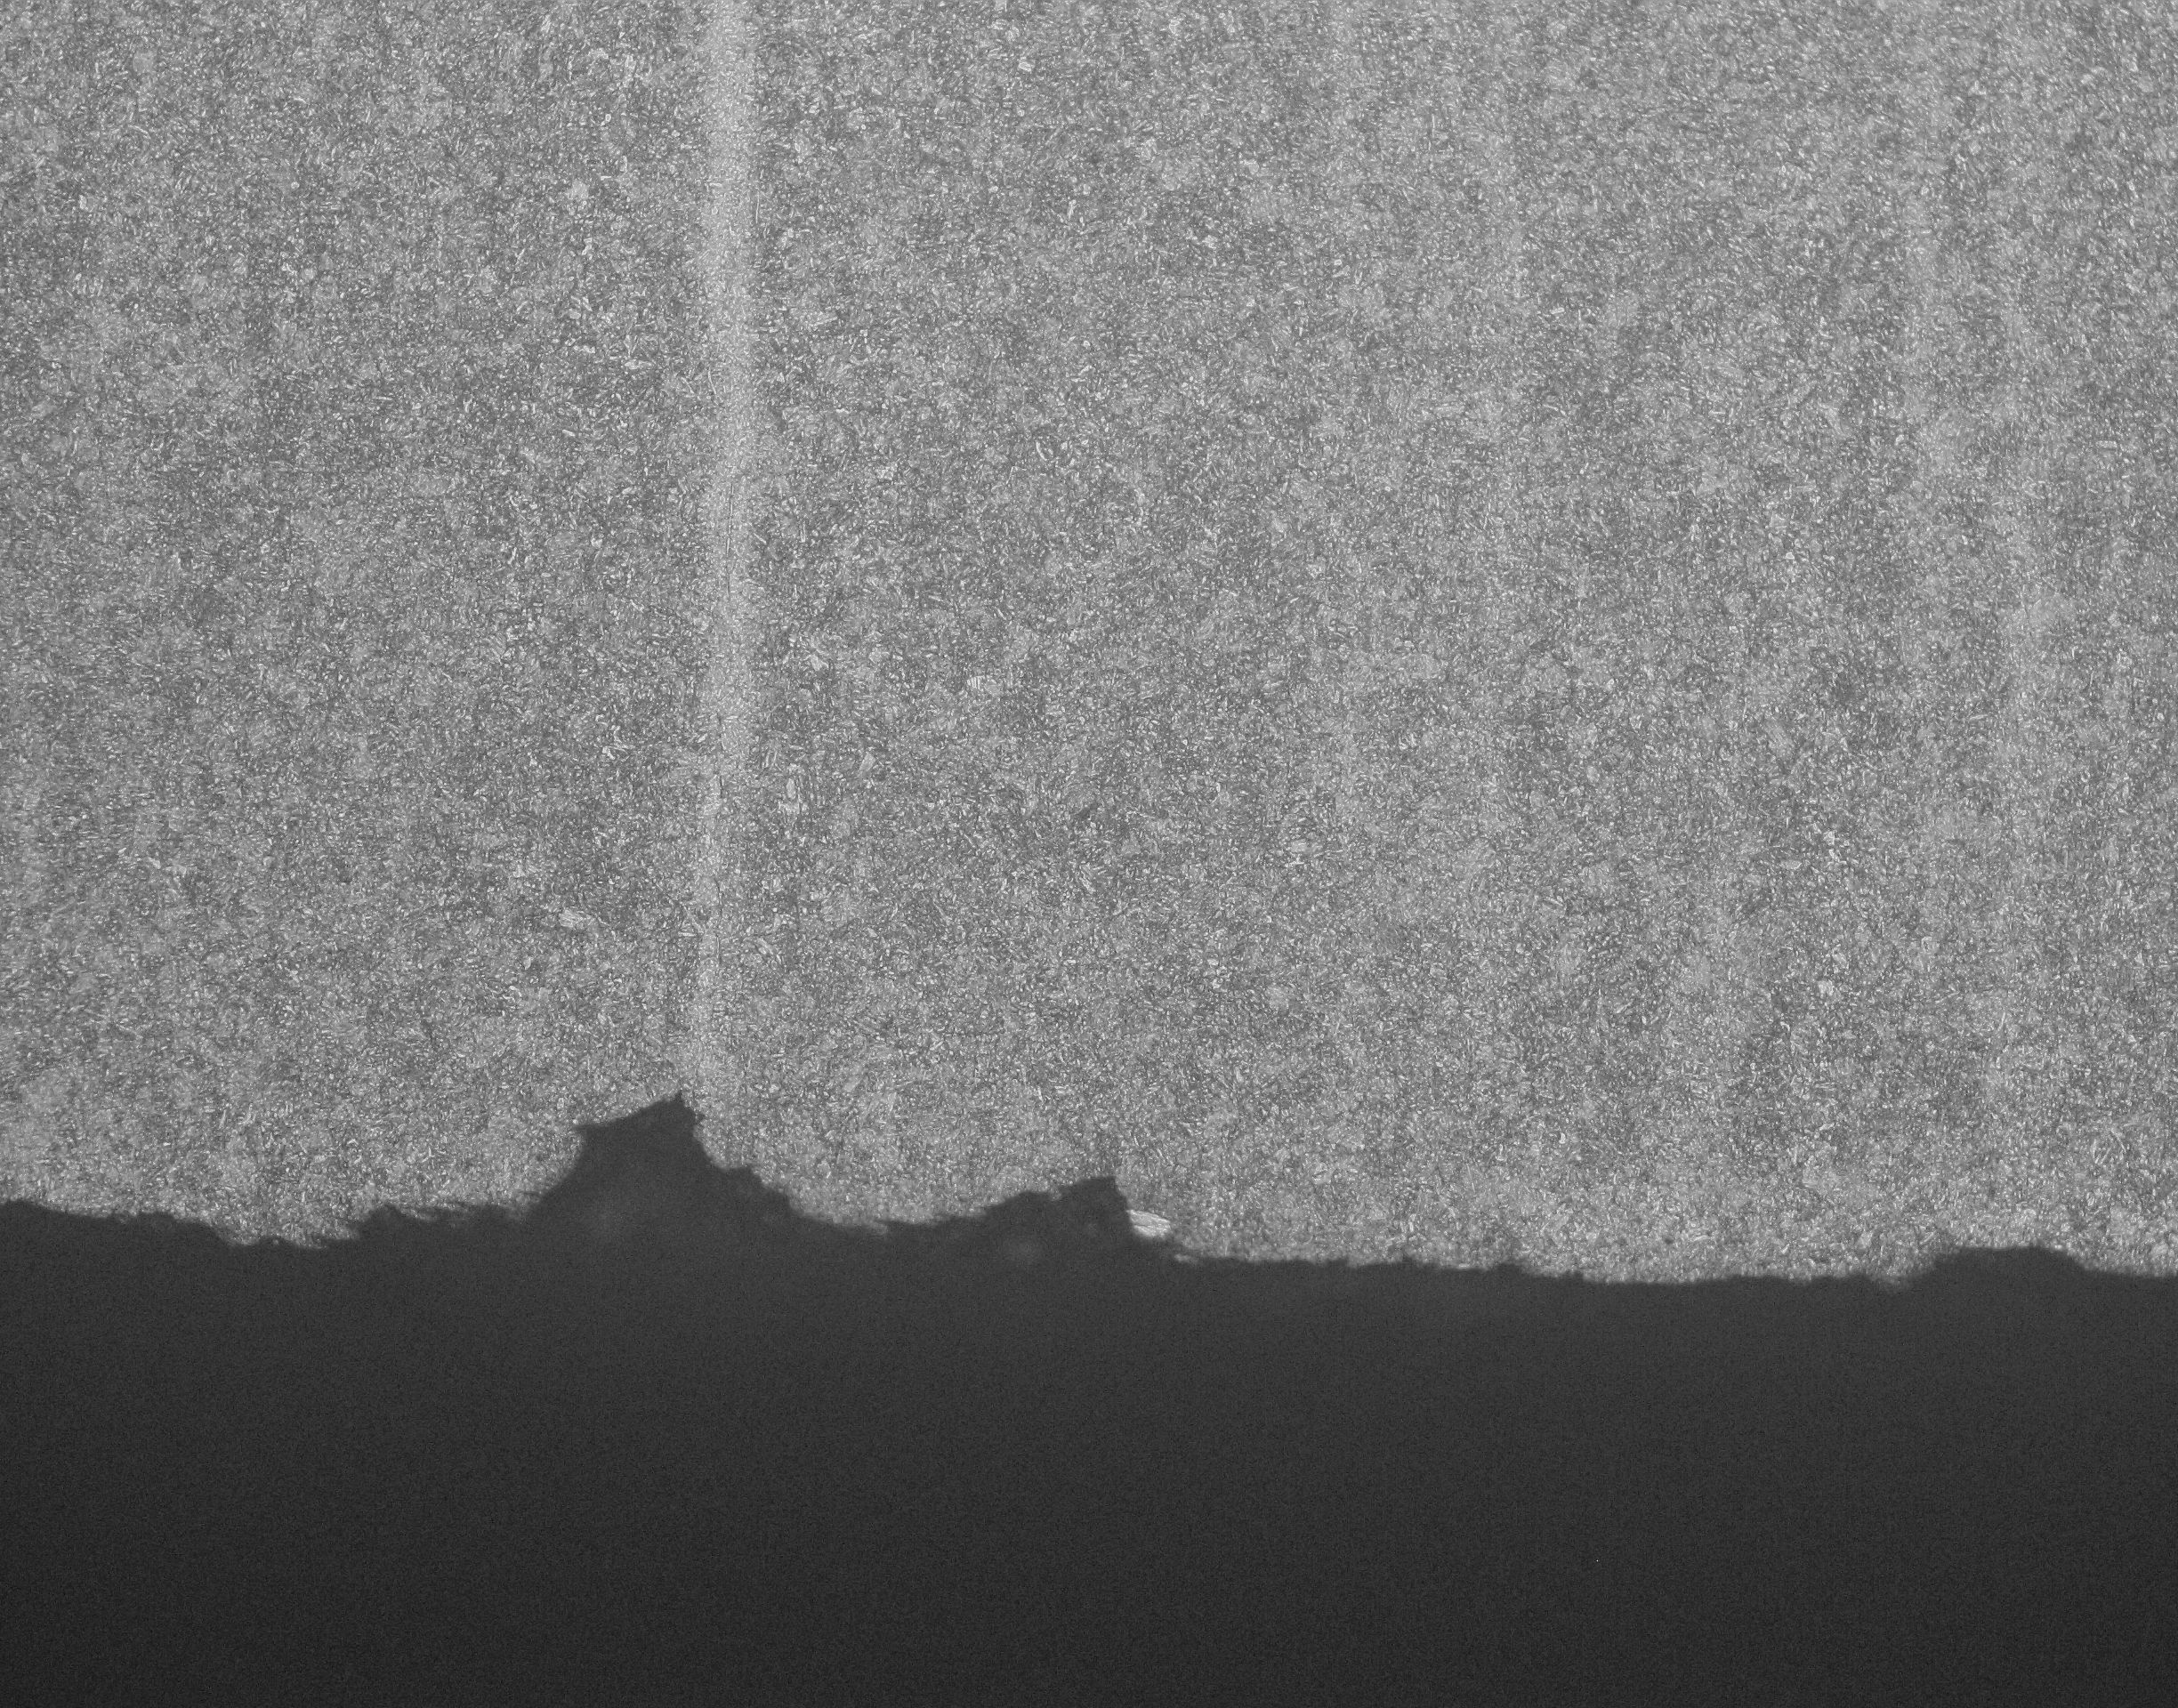

Supplement: f1 [file 2382759.f1.zip › Figure14.Micro-morphologyofthebandatthefractureorigin.JPG]
